# Supplementary material
Source: PubMed Central journal article supplement (PMC5123885)
Supplement: 10-1055-s-0042-118180-sup_gf1104.pdf [file 10-1055-s-0042-118180-sup_gf1104.pdf]

# Auswirkungen und mögliche Prädiktoren gesundheitsschädigender Verhaltensweisen und psychischer Beeinträchtigungen in der Schwangerschaft – ein Überblick

Consequences and Possible Predictors of Health-damaging Behaviors and Mental Health Problems in Pregnancy – A Review

**Autoren**

**F. Ulrich, F. Petermann**

**Institut**

Zentrum für Klinische Psychologie und Rehabilitation der Universität Bremen, Bremen

## Schlüsselwörter

- Früherkennung
- Prädiktoren
- Risikofaktoren
- Schwangerschaft
- Übersicht

## Key words

- early identification
- predictors
- risk factors
- pregnancy
- review

**eingereicht** 23.6.2016

**revidiert** 13.9.2016

**akzeptiert** 25.9.2016

## Bibliografie

**DOI** <http://dx.doi.org/10.1055/s-0042-118180>  
Geburtsh Frauenheilk 2016; 76:  
1–23 © Georg Thieme  
Verlag KG Stuttgart · New York ·  
ISSN 0016-5751

## Korrespondenzadresse

**Dr. Franziska Ulrich,  
Dipl.-Psych.**  
Zentrum für Klinische  
Psychologie und Rehabilitation  
der Universität Bremen  
Grazer Straße 6  
28359 Bremen  
f.ulrich@uni-bremen.de

## Zusammenfassung

▼  
In den letzten Jahrzehnten hat sich das Wissen über die kurz- und langfristigen Effekte von gesundheitsschädigenden Verhaltensweisen und Beeinträchtigungen im psychischen Befinden der Schwangeren und deren zugrunde liegenden Mechanismen zunehmend verbessert. Weniger bekannt ist demgegenüber, welche Faktoren aufseiten der Schwangeren diese Risiken begünstigen können. Das Ziel dieses Beitrags ist es, den aktuellen Forschungsstand zu den Folgen eines Nikotin- und Alkoholkonsums, einer Fehlernährung, einer starken Gewichtszunahme bzw. einer Adipositas sowie psychischer Beeinträchtigungen (Depression und Ängste) zusammenzufassen. Darüber hinaus werden Merkmale der schwangeren Frauen bestimmt, die das Auftreten dieser Risiken erhöhen können. Kenntnisse hierzu erleichtern es dem Kliniker, kritische Fälle frühzeitig zu identifizieren und bedarfsgerechte Unterstützungsangebote einzuleiten. Die Literaturdurchsicht hat gezeigt, dass bestimmte Merkmale der Schwangeren (z.B. Merkmale der Partnerschaft, psychische Belastungen vor dem Einsetzen der Schwangerschaft) sowohl mit verschiedenen gesundheitsschädigenden Verhaltensweisen als auch mit Beeinträchtigungen im psychischen Befinden assoziiert sind. Die betroffenen Frauen weisen dabei zumeist eine Kumulation von psychosozialen Belastungen auf, die bereits vor der Schwangerschaft vorhanden sind, aber auch nach der Geburt des Kindes weiterhin bestehen bleiben können.

## Einleitung

▼  
Aufgrund der hohen Entwicklungsplastizität erweist sich ein heranwachsendes Kind gegenüber Umwelteinflüssen in frühen Lebensphasen als besonders sensibel [1,2]. Als vielfach erforschte Fak-

## Abstract

▼  
In recent decades, the understanding of the short and longer term effects of health-damaging behaviors and mental health problems in pregnant women and the underlying mechanisms of these behaviors and illnesses has significantly increased. In contrast, little is known about the factors affecting individual pregnant women which contribute to health-damaging behaviors and mental illness. The aim of this paper was therefore to summarize the current state of research into the consequences of nicotine and alcohol consumption, malnutrition, excessive weight gain or obesity, and impaired mental health (depression and anxiety) during pregnancy. In addition, the characteristics of pregnant women which increase their risk of developing such behaviors or mental disorders are described. A better knowledge of these risks should make it easier for clinicians to identify cases at risk early on and put measures of support in place. A review of the literature has shown that certain characteristics of pregnant women (e.g. her relationship with her partner, a previous history of mental illness prior to pregnancy) are associated with various health-damaging behaviors as well as with impaired mental health. Affected women often show an accumulated psychosocial stress which was already present prior to the pregnancy and which may persist even after the birth of the child.

toren, die nicht nur den Verlauf einer Schwangerschaft und Geburt nachhaltig beeinflussen können, sondern auch zu überdauernden gesundheitlichen Beeinträchtigungen und psychischen Störungen im Kindes- und Jugendalter führen können, gelten ein Nikotin- und Alkoholkonsum

[3], eine Mangel- oder Fehlernährung [4], eine zu starke Gewichtszunahme bzw. Adipositas der Schwangeren [5] sowie Beeinträchtigungen im psychischen Befinden der werdenden Mutter wie etwa durch hohe Stressbelastungen und Ängstlichkeit [6]. Die Zusammenhänge zwischen frühen Umwelteinwirkungen und späteren Erkrankungen des Kindes begründeten die Annahme einer *fetalen* bzw. *perinatalen Programmierung*, wonach Bedingungen im Mutterleib wie etwa suboptimale Nährstoffversorgung oder erhöhte Stresshormonkonzentrationen während kritischer Entwicklungsphasen komplexe Anpassungsprozesse anregen und so zu einer dauerhaften Veränderung der Struktur und Funktionsweise verschiedener Organe (z.B. Verdauungs-, kardiovaskuläres und zentrales Nervensystem) führen können [7,8]. Diese Annahme wird unterstützt durch zunehmende Erkenntnisse aus der Epigenetik, die sich mit molekularen, immunologischen und endokrinen Mechanismen beschäftigt, die eine durch Umwelteinflüsse (u.a. Stresshormone) bedingte Veränderung der Genaktivität herbeiführen, ohne die DNA-Sequenz selbst zu verändern [9]. Mütterliche Erfahrungen und Umwelteinflüsse in der Perinatalzeit können dementsprechend bspw. über die Methylierung der DNA oder der Modifizierung von Histonen die Genexpression erhöhen oder reduzieren und dadurch langfristige Veränderungen verschiedener biologischer Systeme bewirken [2,10]. Allerdings ist das Wissen über die genaue Beziehung zwischen widrigen intrauterinen Umwelteinwirkungen und möglichen gesundheitlichen und psychischen Beeinträchtigungen des Kindes einerseits und den konkreten zugrunde liegenden Mechanismen andererseits bislang noch sehr begrenzt und keineswegs vollständig geklärt. Dies ist u.a. der Tatsache geschuldet, dass Risikofaktoren ihre Wirkung auf eine vielschichtige Art und Weise entfalten, wobei auch komplexe Wechselbeziehungen zwischen genetischen Faktoren und Umwelteinflüssen zu berücksichtigen sind [7].

Trotz dieser Einschränkungen sind die Erkenntnisse zu den Auswirkungen intrauteriner Einflüsse von hoher praktischer Relevanz, da sie zu einem besseren Verständnis entwicklungspsychopathologischer Prozesse beitragen und die Notwendigkeit früh ansetzender Präventionsmaßnahmen aufzeigen [9]. So handelt es sich bei der Mehrzahl an gesundheitsschädigenden Verhaltensweisen und bei psychischen Beeinträchtigungen um vermeidbare bzw. durch zielgerichtete Präventions- und Interventionsangebote veränderbare Faktoren in der Perinatalzeit [1]. Für eine effektive Früherkennung und bedarfsgerechte Prävention und Gesundheitsförderung sind dafür auch Kenntnisse darüber von besonderem Nutzen, welche Faktoren aufseiten der Schwangeren ein gesundheitsschädigendes Verhalten begünstigen oder das Risiko für die Entstehung psychischer Störungen in der Schwangerschaft erhöhen können. Bisherige Forschungsarbeiten betonen vor allem die Bedeutung der Ungleichheit im körperlichen und psychischen Gesundheitszustand aufgrund sozialer Merkmale (z.B. niedriger Bildungsstand, geringes Einkommen) [11–14]. Es ist jedoch weniger der soziale Status, der sich primär auf den körperlichen und psychischen Gesundheitszustand der werdenden Mutter auswirkt, als vielmehr die (sozial bedingten) Unterschiede in möglichen Belastungen (z.B. Wohn- und Arbeitssituation), in der Verfügbarkeit von Ressourcen, in der Verbreitung von gesundheitsschädigenden Verhaltensweisen und in der medizinischen Versorgung [11–12]. Jene Faktoren können wiederum die Anpassungsleistungen von werdenden Müttern an eine Vielzahl von physiologischen, psychischen und sozialen Veränderungen in der Perinatalzeit beeinflussen [15].

Diesem Aspekt wurde in bisherigen Übersichtsarbeiten bislang jedoch wenig Aufmerksamkeit geschenkt.

Dieser Beitrag zielt darauf ab, zunächst bisherige Befunde zu den Konsequenzen gesundheitsschädigender Verhaltensweisen (Nikotin- und Alkoholkonsum, Mangel- oder Fehlernährung, eine starke Gewichtszunahme bzw. Übergewicht/Adipositas) und psychischer Beeinträchtigungen der Schwangeren für sich selbst und ihr ungeborenes Kind zusammenzufassen und einen Überblick zur Häufigkeit des Vorkommens dieser Risiken zu geben. Im zweiten Schritt sollen Ergebnisse zu möglichen Faktoren aufgezeigt werden, die gesundheitsschädigende Verhaltensweisen und psychische Beeinträchtigungen von Frauen in der Schwangerschaft begünstigen können. Im Fokus des Beitrags stehen dabei Einflussfaktoren, die primär bei der Schwangeren selbst (z.B. Alter, Belastungen durch Stress, kritische Lebensereignisse, schwangerschaftsspezifische Faktoren) oder im näheren Umfeld (z.B. Merkmale der Partnerschaft, Verfügbarkeit an sozialer Unterstützung) anzusiedeln sind. Dazu wurde eine umfassende Literaturrecherche im Web of Science und PubMed durchgeführt. Als Suchtermini wurden folgende Begriffe bzw. Begriffspaare verwendet:

- ▶ Schwangerschaft: [„pregnancy“, „prenatal“, „antenatal“, „perinatal“];
- ▶ Nikotin- und Alkoholkonsum: [„alcohol“ OR „drinking“ OR „smoking“ OR „nicotine“];
- ▶ Ernährung und Gewichtszunahme: [„nutrition“ OR „malnutrition“ OR „eating behavior“, „obesity“ OR „overweight“ OR „weight gain“];
- ▶ psychische Beeinträchtigungen: [„depression“ OR „anxiety“ OR „mental health/illness“ OR „stress“];
- ▶ Outcome: [„complications“ OR „preterm delivery“ OR „premature“ OR „fetal growth“, „birth weight“ OR „behavior problems“ OR „internalizing behavior“ OR „externalizing behavior“, „development“].

Zur Bestimmung von Einflussfaktoren wurden die Begriffe „correlates“, „predictors“, „risks“ gewählt. Darüber hinaus wurden die Literaturverzeichnisse auf weitere relevante Arbeiten durchsucht.

## Studienauswahl

▼ Aufgrund der Fülle an Studien wurden in diesem Übersichtsbeitrag primär systematische Reviews und Metaanalysen berücksichtigt. In Ergänzung dazu wurden Einzelstudien in den Beitrag mit aufgenommen, wenn sie nach der Durchsicht der Titel und Abstracts die folgenden Kriterien erfüllten:

- ▶ Studien beschäftigen sich entweder mit den Auswirkungen von gesundheitsschädigenden Verhaltensweisen und/oder von psychischen Beeinträchtigungen für die Schwangere selbst (z.B. medizinische Komplikationen) oder für ihr Kind.
- ▶ Studien zielen auf die Bestimmung von begünstigenden Faktoren für gesundheitsschädigende Verhaltensweisen und/oder psychischen Beeinträchtigungen der Schwangeren ab.
- ▶ Die Daten wurden in der Schwangerschaft bzw. spätestens zum Zeitpunkt der Geburt erhoben.
- ▶ Es wurden nur freizugängliche Publikationen in englischer oder deutscher Sprache ausgewählt.
- ▶ Die Suche wurde auf Zeitschriftenbeiträge aus dem Publikationszeitraum Januar 2005 bis Juli 2016 eingegrenzt, um damit die Aktualität der Studien zu gewährleisten.

- Ausgeschlossen wurden Studien, die sich mit Unfruchtbarkeit, mit Mehrlingsgeburten, und In-vitro-Fertilisation oder Leihmutterschaft befassen.
- Unberücksichtigt blieben auch Studien, welche die genannten Risikofaktoren im Zusammenhang mit medizinischen Untersuchungen (z.B. Fruchtwasseruntersuchung) oder in Hochrisikogruppen (z.B. HIV-Infektion) analysieren, oder Studien, die über Ergebnisse von Präventions- und Interventionsprogrammen berichten.

## Nikotin- und Alkoholkonsum

Nikotin- und Alkoholkonsum stellen die wichtigsten modifizierbaren Risiken für die Schwangere und ihr ungeborenes Kind dar [7, 16]. Mittlerweile gibt es zahlreiche Hinweise dafür, dass der mütterliche Nikotinkonsum in der Schwangerschaft mit überdauernden morphologischen Veränderungen (z.B. frühzeitige Beendigung der Zelldifferenzierung) und Störungen in neuronalen Transmittersystemen im fetalen Gehirn verknüpft ist [17]. Des Weiteren wird angenommen, dass der Nikotinkonsum die normale Plazentafunktion beeinträchtigt und so zu einem Sauerstoffmangel (fetale Hypoxie) und einer verringerten Versorgung mit Nährstoffen beim Fetus führen kann [3]. Ähnlich wie Nikotin können auch Alkohol und dessen Abbauprodukte über die Plazenta in den fetalen Blutkreislauf gelangen und die Organentwicklung und die Hirnreifung des heranwachsenden Kindes nachhaltig beeinträchtigen [3].

### Auswirkungen eines Nikotin- und Alkoholkonsums in der Schwangerschaft

Die medizinischen Komplikationen für die Schwangere infolge des *Nikotinkonsums* können einen vorzeitigen Blasensprung, eine vorzeitige Plazentalösung und Placenta praevia [18] und ein erhöhtes Risiko für eine Fehl-, Tot- oder Frühgeburt umfassen [16, 19, 20]. Ebenso stehen intrauterine Wachstumsstörungen [21], angeborene Anomalien [22], ein geringes Geburtsgewicht, die Gefahr eines plötzlichen Kindstods [23] im Zusammenhang mit pränataler Nikotinexposition. Langfristig gesehen ist der mütterliche Nikotinkonsum während der Schwangerschaft mit einem erhöhten Risiko für spätere gesundheitliche Beeinträchtigungen, z.B. Herz- und Atemwegserkrankungen oder Übergewicht [16], aber auch mit Verhaltensstörungen (insbesondere ADHS und aggressives Verhalten) [24, 25] und kognitiven Defiziten [26] im weiteren Entwicklungsverlauf des Kindes verbunden.

Die schädigenden Effekte eines *chronischen bzw. hohen Alkoholkonsums* bis hin zum Substanzmissbrauch und -abhängigkeit in der Schwangerschaft für das ungeborene Kind sind seit Langem bekannt [3]. Die Folgen für das betroffene Kind können prä- und postnatale Wachstumsstörungen, alkoholbedingte Geburtsdefekte, unterschiedlich stark ausgeprägte Entwicklungs- und Verhaltensstörungen, Intelligenzminderung und neuropsychologische Beeinträchtigungen umfassen [27]. Aktuelle Studien widmen sich verstärkt auch den Auswirkungen eines *geringen bis moderaten Alkoholkonsums* (> 0 bis 6 alkoholische Getränke pro Woche) oder eines *episodenhaften exzessiven Alkoholkonsums* (sog. Binge Drinking; mehr als 4–5 alkoholische Getränke pro Anlass). Wenn Frauen mehr als ein bzw. mehr als 1 ½ alkoholhaltige Getränke pro Tag in der Schwangerschaft zu sich nehmen, besteht ein erhöhtes Risiko für Frühgeburtslichkeit, intrauterine Wachstumsrestriktionen sowie ein geringes Geburtsgewicht [28]. Eine aktuelle Metaanalyse, in der 34 empirische Studien

aus den Jahren 1988–2012 eingeschlossen wurden, untersuchte die langfristigen Effekte milder, moderater und exzessiver Alkoholexposition auf die neuropsychologischen Funktionen des betroffenen Kindes, einschließlich Aufmerksamkeitskapazität, Lesefertigkeiten, exekutive Funktionen und Verhalten [29]. Dabei konnten die Autoren aufzeigen, dass bereits moderate Alkoholgaben mit Beeinträchtigungen in der Verhaltensregulation und interaktiven Spielfertigkeiten assoziiert sein können, wobei die klinische Relevanz dieser Einschränkungen gering bis moderat ausfällt. Kognitive Funktionen von Kindern im Alter zwischen 6 Monaten und 14 Jahren können zumeist durch einen gelegentlichen exzessiven Alkoholkonsum der Schwangeren erheblich beeinträchtigt werden [29]. Auch aktuelle Studien verdeutlichen, dass ein episodenhafter exzessiver Alkoholkonsum der werdenden Mutter in der Früh- und Spätschwangerschaft mit externalisierenden Symptomen bei den betroffenen Kindern im Alter zwischen 5 und 7 Jahren, auch nach Kontrolle weiterer Einflussvariablen (z.B. Bildungsstand und psychiatrische Erkrankung der Mutter) einhergehen kann [30, 31].

### Häufigkeit des Nikotin- und Alkoholkonsums in der Schwangerschaft

Trotz dieser gesundheitlichen Beeinträchtigungen für die Schwangere selbst und für ihr heranwachsendes Kind konsumieren Frauen während der Schwangerschaft Nikotin und Alkohol. In Deutschland liegen nur vereinzelt aktuelle prospektive Studien zur Prävalenz des Nikotin- und Alkoholkonsums von Schwangeren vor. Die Angaben variieren in Abhängigkeit des Erhebungszeitpunkts zwischen 11,2 bis 12,4% für den mütterlichen *Nikotinkonsum* in der Schwangerschaft [32, 33]. Aktuelle prospektive Studien mit Beginn der Datenerhebung in der Schwangerschaft, welche die Verbreitung des mütterlichen *Alkoholkonsums* in Deutschland untersuchen, liegen, soweit bekannt, nicht vor. Aufschlussreich sind dafür die Ergebnisse des Kinder- und Jugendgesundheits surveys (KiGGS-Studie), wonach 13,5% der befragten Mütter berichteten, in der Schwangerschaft Alkohol konsumiert zu haben [34].

### Begünstigende Faktoren eines Nikotin- und Alkoholkonsums in der Schwangerschaft

Die Literaturrecherche ergab, dass nur 2 Übersichtsarbeiten, die sich mit unterschiedlichen *Einflussfaktoren* auf den mütterlichen Nikotin- und/oder Alkoholkonsum bzw. auf dessen Verzicht in der Schwangerschaft beschäftigen, aus den Jahren 2010 bzw. 2011 vorliegen (vgl. **Tab. 1**). Ein weiterer Übersichtsbeitrag widmet sich ausschließlich der Bedeutung sozialer Unterstützung in der Schwangerschaft für das Gesundheitsverhalten (vor allem Nikotin- und Alkoholkonsum) der Schwangeren. Aus diesem Grund wurde nach weiteren, aktuellen Studien recherchiert, die Faktoren untersuchen, welche mit einem fortgesetzten Nikotin- und/oder Alkoholkonsum einhergehen können. Insgesamt wurden die Ergebnisse von weiteren 19 Studien im Zeitraum von 2012 bis 2015 in diesen Beitrag aufgenommen (vgl. **Tab. 2**). Im Folgenden werden zunächst die Ergebnisse zum Nikotin- und anschließend zum Alkoholkonsum berichtet.

Zu den wesentlichen soziodemografischen und ökonomischen Faktoren, die mit einem mütterlichen *Nikotinkonsum* in der Schwangerschaft assoziiert sind, zählen der Familien- und der Bildungsstand der Schwangeren (vgl. **Tab. 2**). Demnach setzen vor allem alleinstehende Frauen mit einem niedrigen Bildungsniveau ihren Nikotinkonsum in der Schwangerschaft fort [32, 35, 51, 56–58, 61, 65, 67–68]. In 3 Studien waren es zudem eher Frau-

**Tab. 1** Befunde von Übersichtsarbeiten und Metaanalysen zu Einflussfaktoren auf gesundheitsrelevante und verhaltensbezogene Risiken von Schwangeren.

| Autoren                                         | mütterlicher Risikofaktor               | Einflussfaktoren                                                                                                          | Angaben zu Studien                                                                                                         | Hauptergebnisse und Anmerkungen                                                                                                                                                                                                                                                                                                                                                                                                                                                                                                                                                                                                                                                                                                            |
|-------------------------------------------------|-----------------------------------------|---------------------------------------------------------------------------------------------------------------------------|----------------------------------------------------------------------------------------------------------------------------|--------------------------------------------------------------------------------------------------------------------------------------------------------------------------------------------------------------------------------------------------------------------------------------------------------------------------------------------------------------------------------------------------------------------------------------------------------------------------------------------------------------------------------------------------------------------------------------------------------------------------------------------------------------------------------------------------------------------------------------------|
| <b>Nikotin- und Alkoholkonsum</b>               |                                         |                                                                                                                           |                                                                                                                            |                                                                                                                                                                                                                                                                                                                                                                                                                                                                                                                                                                                                                                                                                                                                            |
| [35] <sup>a</sup>                               | Nikotin-konsum                          | soziale Faktoren, Nikotinkonsumverhalten, soziale Beziehungen, schwangerschaftsspezifische Faktoren                       | n = 19 Studien von 1997 bis 2008                                                                                           | Signifikante Zusammenhänge zwischen pränatalem Nikotinkonsum und folgenden Faktoren: Einkommen (in 4 von 5 Studien); Partner, der raucht (in 6 von 6 Studien); hohe Anzahl an Kindern (in 11 von 12 Studien); hohe Menge des Nikotinkonsums (in 7 von 8 Studien); seltenere und spätere Wahrnehmung der Schwangerenvorsorge (in 4 von 5 Studien).                                                                                                                                                                                                                                                                                                                                                                                          |
| [36] <sup>a</sup>                               | Alkohol-konsum                          | psychosoziale und verhaltensbezogene Faktoren                                                                             | n = 14 Studien (n = 11 Querschnittstudien; n = 3 Längsschnittstudien) von 2002 bis 2009                                    | Signifikante und konsistente Zusammenhänge zwischen pränatalem Alkoholkonsum und präkonzeptionellen Alkoholkonsum (in 7 von 7 Studien) und Missbrauch-/Gewalterfahrungen (in 3 von 3 Studien). Signifikante Zusammenhänge mit höherem Alter (in 7 von 12 Studien); Nikotinkonsum (5 von 10 Studien) und zunehmende Anzahl an Kindern (4 von 10 Studien). Inkonsistente Befunde für sozioökonomischen Status, Bildungsstand, Erwerbslosigkeit, Familienstand und Alkoholabhängigkeit.                                                                                                                                                                                                                                                       |
| [37] <sup>a</sup>                               | Nikotin- und Alkohol-konsum             | soziale Unterstützung                                                                                                     | n = 13 Studien 2003–2013                                                                                                   | Signifikante Zusammenhänge zwischen pränatalem Nikotinkonsum und sozialer Unterstützung (in 7 von 10 Studien); keine konsistenten Zusammenhänge mit pränatalem Alkoholkonsum (in 1 von 3 Studien).                                                                                                                                                                                                                                                                                                                                                                                                                                                                                                                                         |
| <b>Ernährung und Gewichtszunahme/Adipositas</b> |                                         |                                                                                                                           |                                                                                                                            |                                                                                                                                                                                                                                                                                                                                                                                                                                                                                                                                                                                                                                                                                                                                            |
| [37] <sup>a</sup>                               | Ernährung                               | soziale Unterstützung                                                                                                     | n = 3 Studien 2003–2013                                                                                                    | Signifikante Zusammenhänge zwischen sozialer Unterstützung bzw. Zufriedenheit mit sozialer Unterstützung und Ernährung bei Frauen mit geringem Einkommen und Migrationshintergrund (in 2 von 3 Studien). Keine aussagekräftigen Ergebnisse aufgrund der geringen Anzahl an Studien möglich.                                                                                                                                                                                                                                                                                                                                                                                                                                                |
| [38] <sup>a</sup>                               | Qualität der zugeführten Nahrungsmittel | psychische Gesundheit der Mutter in der Perinatalzeit                                                                     | n = 9 Studien (n = 4 Kohortenstudien; n = 5 Querschnittstudien) 2005–2013                                                  | Signifikante Zusammenhänge zwischen ungesunder Ernährungsweise bzw. Zufuhr von Lebensmitteln geringerer Qualität und pränatalem depressiven (in 3 von 3 Studien) und Stresssymptomen (in 3 von 3 Studien). Begrenzte Aussagekraft aufgrund geringer Studienanzahl. Keine Aussagen zur Wirkrichtung möglich. Möglicherweise andere Faktoren wie soziale Unterstützung, psychische Erkrankung vor der Schwangerschaft sowie sozioökonomische Faktoren bedeutsam.                                                                                                                                                                                                                                                                             |
| [39] <sup>a</sup>                               | exzessive Gewichtszunahme               | Ängste, Depression, Stress, soziale Unterstützung, Unzufriedenheit mit Körperbild, Selbstwertgefühl und Selbstwirksamkeit | n = 12 Studien (n = 2 Querschnittstudien; n = 8 Längsschnittstudien; n = 2 randomisierte Kontrollgruppenstudien) 2000–2014 | Signifikante Zusammenhänge zwischen exzessiver Gewichtszunahme und Depression (in 2 von 2 Studien); Unzufriedenheit mit eigenem Körperbild (in 4 von 6 Studien) und soziale Unterstützung (1 Studie). Keine Aussagen zur Wirkrichtung möglich.                                                                                                                                                                                                                                                                                                                                                                                                                                                                                             |
| [40] <sup>a</sup>                               | exzessive Gewichtszunahme               | psychologische Merkmale (Affekt, Einstellungen, Motive zur Gewichtszunahme und zur Ernährung)                             | n = 35 Studien (n = 8 Querschnittstudien; n = 25 Kohortenstudien; n = 2 Fallkontrollstudien)                               | Signifikante Zusammenhänge zwischen exzessiver Gewichtszunahme und gewichtsbezogenen sowie ernährungsbezogenen Kognitionen: Unzufriedenheit mit eigenem Körperbild (2 von 4 Studien); negative Einstellungen zur Gewichtszunahme (4 von 6 Studien); inadäquate Wahrnehmung des Gewichts sowohl bei normal- als auch übergewichtigen Frauen (1 von 2 Studien); höhere Werte in kognitiver Ernährungszügelung (2 von 3 Studien). Weitere Prädiktoren, jedoch mit weiteren Forschungsbedarf verbunden, sind wahrgenommene Barrieren einer gesunden Essverhaltens (1 Studie); Sorgen/Bedenken über Gewichtszunahme (1 Studie); geringes Wissen über Gewichtszunahme (1 Studie). Keine Zusammenhänge mit Affekt (Angst, Depression und Stress). |
| [41] <sup>a, b</sup>                            | Adipositas und Übergewicht              | psychische Störungen in der Schwangerschaft und nach der Geburt                                                           | n = 62 Studien                                                                                                             | Adipöse/übergewichtige Schwangere haben erhöhtes Risiko für pränatale Depression (adipöse Schwangere OR = 1,43; übergewichtige Schwangere OR = 1,19); für postpartale Depression (adipöse Schwangere: OR = 1,30; übergewichtige Schwangere: OR = 1,09) und ebenso höheres Risiko für Angstsymptomatik in der Schwangerschaft (OR = 1,41).                                                                                                                                                                                                                                                                                                                                                                                                  |
| [42] <sup>a</sup>                               | exzessive Gewichtszunahme               | Angstsymptome der Mutter                                                                                                  | n = 13 Studien (n = 10 Längsschnittstudien; n = 3 Interventionsstudien) von 2000 bis 2015                                  | Signifikanter Zusammenhang zwischen Adipositas und Angst der werdenden Mutter (5 von 7 Studien). Ergebnisse im Sinne einer Komorbidität zu verstehen, da präkonzeptionelle Angstsymptomatik nicht erfasst wurde.                                                                                                                                                                                                                                                                                                                                                                                                                                                                                                                           |

Fortsetzung nächste Seite

**Tab. 1** Befunde von Übersichtsarbeiten und Metaanalysen zu Einflussfaktoren auf gesundheitsrelevante und verhaltensbezogene Risiken von Schwangeren. (Fortsetzung)

| Autoren                              | mütterlicher Risikofaktor       | Einflussfaktoren                                              | Angaben zu Studien                                                                                                                | Hauptergebnisse und Anmerkungen                                                                                                                                                                                                                                                                                                                                                                                                                                                                                                                                                                                                                                                                                                                                                                                                                                                                                                                                                                                                                                                                                                                                                                                              |
|--------------------------------------|---------------------------------|---------------------------------------------------------------|-----------------------------------------------------------------------------------------------------------------------------------|------------------------------------------------------------------------------------------------------------------------------------------------------------------------------------------------------------------------------------------------------------------------------------------------------------------------------------------------------------------------------------------------------------------------------------------------------------------------------------------------------------------------------------------------------------------------------------------------------------------------------------------------------------------------------------------------------------------------------------------------------------------------------------------------------------------------------------------------------------------------------------------------------------------------------------------------------------------------------------------------------------------------------------------------------------------------------------------------------------------------------------------------------------------------------------------------------------------------------|
| <b>psychische Beeinträchtigungen</b> |                                 |                                                               |                                                                                                                                   |                                                                                                                                                                                                                                                                                                                                                                                                                                                                                                                                                                                                                                                                                                                                                                                                                                                                                                                                                                                                                                                                                                                                                                                                                              |
| [43] <sup>a, b</sup>                 | perinatale Depression           | ungewollte Schwangerschaft                                    | n = 10 Studien (n = 5 Querschnittstudien; n = 4 Längsschnittstudien; n = 1 randomisierte Kontrollgruppenstudie) von 1991 bis 2014 | Prävalenz mütterlicher perinataler Depression bei ungewollter Schwangerschaft: 21 %<br>Anmerkungen: Nur 3 Studien erhoben Daten zum Zeitpunkt der Schwangerschaft. Einsatz unterschiedlicher Instrumente zur Erhebung von Depression.                                                                                                                                                                                                                                                                                                                                                                                                                                                                                                                                                                                                                                                                                                                                                                                                                                                                                                                                                                                        |
| [44] <sup>a</sup>                    | perinatale Depression           | Missbrauchserfahrungen                                        | n = 43 Studien (n = 29 Querschnittstudien; n = 14 Längsschnittstudien) bis 2011                                                   | Jegliche Form des Missbrauchs (direkte, indirekte, körperliche, sexuelle oder emotionale Misshandlung) positiv assoziiert mit pränataler und postnataler Depression (nur in 5 Studien ergaben sich keine sign. Zusammenhänge).                                                                                                                                                                                                                                                                                                                                                                                                                                                                                                                                                                                                                                                                                                                                                                                                                                                                                                                                                                                               |
| [45] <sup>a</sup>                    | pränatale Ängste und Depression | psychosoziale, gynäkologische und verhaltensbezogene Faktoren | n = 97 Studien von 2003 bis 2015                                                                                                  | Signifikante Zusammenhänge zwischen pränataler Depression/Angst und folgenden Faktoren:<br>Fehlende partnerschaftliche oder mangelnde soziale Unterstützung (sign. Prädiktor in 29 Studien vs. kein sign. Prädiktor in 0 Studien); früherer Missbrauch und Gewalterfahrung durch Partner (sign. Prädiktor in 28 Studien vs. kein sign. Prädiktor in 0 Studien); widrige Lebensereignisse und hoher wahrgenommener Stress (sign. Prädiktor in 21 Studien vs. kein sign. Prädiktor in 0 Studien); vorausgegangene psychische Erkrankung (sign. Prädiktor in 23 Studien vs. kein sign. Prädiktor in 0 Studien); ungeplante oder ungewollte Schwangerschaft (sign. Prädiktor in 22 Studien vs. kein sign. Prädiktor in 2 Studien); gegenwärtige/vorausgegangene Schwangerschaftskomplikationen oder Fehlgeburten (sign. Prädiktor in 17 Studien vs. kein sign. Prädiktor in 4 Studien); Nikotinkonsum in der Schwangerschaft (sign. Prädiktor in 11 Studien vs. kein sign. Prädiktor in 1 Studie). Weiterer Forschungsbedarf hinsichtlich folgender Risikofaktoren: Alkoholmissbrauch, Substanzmissbrauch, psychische Erkrankung in der Familiengeschichte, Erwerbslosigkeit des Partners, Qualität der Erziehung, Geburtsmodus. |
| [46] <sup>a</sup>                    | perinatale psychische Störungen | psychosoziale und gynäkologische Faktoren                     | n = 47 Studien (n = 13 Studien mit Erhebung in der Schwangerschaft; n = 34 Studien mit Erhebung nach der Geburt) bis 2010         | Signifikante Zusammenhänge zwischen perinatalen psychischen Störungen (zumeist Angst/Depression) und folgenden Faktoren: Sozioökonomische Benachteiligung (OR = 2,1–13,2); ungewollte Schwangerschaft (OR = 1,6–8,8); junges Alter der Mutter (OR = 2,1–5,4); unverheiratet (OR = 3,4–5,8); fehlende Empathie und Unterstützung durch den Partner (OR = 2,0–9,4); ablehnende Verwandte (OR = 2,1–4,4); Gewalterfahrungen durch Partner (OR = 2,11–6,75); Mangel an praktischer und emotionaler Unterstützung (OR = 2,8–6,1); weibliches Geschlecht des Kindes (OR = 1,8–2,6); vorausgegangene psychische Erkrankung der Mutter (OR = 5,1–5,6).                                                                                                                                                                                                                                                                                                                                                                                                                                                                                                                                                                               |
| [47] <sup>a, b</sup>                 | perinatale psychische Störungen | häusliche Gewalt                                              | n = 67 Studien (n = 51 Querschnittstudien; n = 16 Längsschnittstudien) bis 2011                                                   | Frauen mit pränataler oder postpartaler Depression haben ein bis zu 3- bis 5-fach erhöhtes Risiko für Gewalterfahrungen:<br>Gewalterfahrungen bei pränataler Depression (Gewalterfahrungen zu Lebenszeit OR = 3,0, während des vergangenen Jahres OR = 2,8 oder in der Schwangerschaft: OR = 5,0); Gewalterfahrungen bei postpartaler Depression: (Gewalterfahrungen während des vergangenen Jahres OR = 2,9 oder in der Schwangerschaft OR = 3,1).<br>Frauen mit pränatalen Angstsymptomen haben ein bis zu 2,9-fach erhöhtes Risiko für Gewalterfahrungen.<br>Frauen mit pränatalen oder postpartalen PTBS haben ein 4,6- bis 6,4-fach erhöhtes Risiko für Gewalterfahrungen.                                                                                                                                                                                                                                                                                                                                                                                                                                                                                                                                              |
| [48] <sup>a</sup>                    | pränatale Depression            | psychosoziale, gynäkologische und verhaltensbezogene Faktoren | n = 57 Studien von 1980 bis 2008                                                                                                  | Signifikante Zusammenhänge zwischen pränataler depressiver Symptome und folgenden Faktoren:<br>stressige Lebensereignisse, Mangel an sozialer Unterstützung und häusliche Gewalt.                                                                                                                                                                                                                                                                                                                                                                                                                                                                                                                                                                                                                                                                                                                                                                                                                                                                                                                                                                                                                                            |
| [49]                                 | perinatale Angststörungen       | psychosoziale, gynäkologische und verhaltensbezogene Faktoren | n = 98 (n = 47 Studien zu Prädiktoren) von 2006 bis 2014                                                                          | Junges Alter (5 Studien); alleinstehend/ohne Partner (6 Studien); niedriger sozioökonomischer Status (5 Studien); geringer Bildungsstand (9 Studien); Mangel an sozialer Unterstützung (7 Studien); Konflikte in der Partnerschaft (5 Studien), psychische Vorerkrankung (3 Studien); geburtsmedizinische Komplikationen: vorausgegangene Fehlgeburt/Aborte (5 Studien); ungeplante Schwangerschaft; schlechter Gesundheitszustand/Schwangerschaftskomplikationen (3 Studien).                                                                                                                                                                                                                                                                                                                                                                                                                                                                                                                                                                                                                                                                                                                                               |

Fortsetzung nächste Seite

**Tab. 1** Befunde von Übersichtsarbeiten und Metaanalysen zu Einflussfaktoren auf gesundheitsrelevante und verhaltensbezogene Risiken von Schwangeren. (Fortsetzung)

| Autoren              | mütterlicher Risikofaktor        | Einflussfaktoren                                 | Angaben zu Studien                                                                    | Hauptergebnisse und Anmerkungen                                                                                                                                                                                                                                                                                                                                                                                                                                                                                                                                                                                                                                                                                                                                                                                                                                                                                                                                                                               |
|----------------------|----------------------------------|--------------------------------------------------|---------------------------------------------------------------------------------------|---------------------------------------------------------------------------------------------------------------------------------------------------------------------------------------------------------------------------------------------------------------------------------------------------------------------------------------------------------------------------------------------------------------------------------------------------------------------------------------------------------------------------------------------------------------------------------------------------------------------------------------------------------------------------------------------------------------------------------------------------------------------------------------------------------------------------------------------------------------------------------------------------------------------------------------------------------------------------------------------------------------|
| [50] <sup>a, b</sup> | perinatale Depression und Ängste | Risiko- und Schutzfaktoren bedingt durch Partner | n = 120 Studien (62 % Querschnittstudien; 37 % Längsschnittstudien) von 1980 bis 2013 | <p>Merkmale des Partners, die mit Risiko für pränatale Depression oder Ängste assoziiert sind:</p> <p>Konflikte (für Depression <math>r = 0,30</math>; für Ängste <math>r = 0,35</math>); Alkohol- und Drogenkonsum des Partners (für Depression <math>r = 0,16</math>); Rückzugsverhalten des Partners (für Depression <math>r = 0,32</math>).</p> <p>Merkmale des Partners, die Risiko für pränatale Depression oder Ängste reduzieren:</p> <p>emotionale Verbundenheit (für Depression <math>r = -0,25</math>; für Ängste <math>r = -0,22</math>); emotionale (für Depression <math>r = -0,26</math>; für Ängste <math>r = -0,20</math>) und globale Unterstützung (für Depression <math>r = -0,28</math>; für Ängste <math>r = -0,32</math>).</p> <p>Weitere Faktoren, die spezifisch mit pränataler Depression assoziiert sind: positive Kommunikation (<math>r = -0,31</math>); instrumentelle Unterstützung (<math>r = -0,16</math>) und Zufriedenheit mit Partnerschaft (<math>r = -0,29</math>).</p> |

Anmerkungen: OR: Odds Ratio. PTBS: posttraumatische Belastungsstörungen.  $r$  = Korrelationskoeffizient. sign.: signifikant.

<sup>a</sup>: systematischer Review.

<sup>b</sup>: Metaanalyse.

**Tab. 2** Befunde empirischer Studien zu Einflussfaktoren auf gesundheitsschädigende Verhaltensweisen und psychische Beeinträchtigungen von Schwangeren.

| Autoren                           | Land        | Stichprobe                                                                                                                                                                                                                                                                                                                                              | Studien-design                                                  | Erhebungszeitpunkt                       | Häufigkeit                                                                                                                                                                                                       | Ergebnisse zu Einflussfaktoren                                                                                                                                                                                                                                                                                                                                                                                                                                                                                            |
|-----------------------------------|-------------|---------------------------------------------------------------------------------------------------------------------------------------------------------------------------------------------------------------------------------------------------------------------------------------------------------------------------------------------------------|-----------------------------------------------------------------|------------------------------------------|------------------------------------------------------------------------------------------------------------------------------------------------------------------------------------------------------------------|---------------------------------------------------------------------------------------------------------------------------------------------------------------------------------------------------------------------------------------------------------------------------------------------------------------------------------------------------------------------------------------------------------------------------------------------------------------------------------------------------------------------------|
| <b>Nikotin- und Alkoholkonsum</b> |             |                                                                                                                                                                                                                                                                                                                                                         |                                                                 |                                          |                                                                                                                                                                                                                  |                                                                                                                                                                                                                                                                                                                                                                                                                                                                                                                           |
| [32]                              | Deutschland | n = 647 392 Schwangere                                                                                                                                                                                                                                                                                                                                  | populationsbasierte Querschnittstudie                           | Informationen aus Mutterschaftspass 2005 | 12,4 % der Schwangeren rauchen (M = 10 Zigaretten pro Tag).                                                                                                                                                      | Faktoren, die mit fortgesetztem Nikotinkonsum assoziiert sind: sozioökonomischer Status (Hausfrauen: OR = 3,09; ungelernte Arbeitskräfte: OR = 4,44); Alter (< 20 Jahre: OR = 5,96); Anzahl bisheriger Geburten (mehr als 2 Kinder: OR = 2,64); inadäquate Schwangerenversorgung (weniger als 5 Termine: OR = 1,76)                                                                                                                                                                                                       |
| [51]                              | Niederlande | n = 6 104 Schwangere (M = 30,4 J.; SD = 4,6)                                                                                                                                                                                                                                                                                                            | prospektive populationsbasierte Kohortenstudie (DELIVER- Study) | 34. SSW (Median = 19. SSW) 2009–2011     | 9,2 % der Schwangeren setzen Nikotinkonsum fort. Raucherinnen konsumieren im Mittel 7,8 Zigaretten pro Tag (SD = 4,4, Range 1,5–20); gelegentliche Raucherinnen 8,8 Zigaretten pro Woche (SD = 8,1, Range 0–50). | Prädiktoren für jeglichen Nikotinkonsum: geringer Bildungsstand (OR = 10,3); türkische Ethnizität (OR = 3,9); alleinstehend (OR = 3,7); ungeplante Schwangerschaft (OR = 1,4); Untergewicht (OR = 2,1); Alkoholkonsum in der Schwangerschaft (OR = 1,4); geringe gesundheitsbezogene Kontrollüberzeugungen (OR = 1,4); erhöhte Angst- und Depressionswerte (OR = 1,8). Frauen, die täglich rauchen, haben häufiger ungeplante Schwangerschaft (OR = 1,5); Untergewicht (OR = 2,6) und verzichten auf Folsäure (OR = 1,6). |
| [52]                              | Niederlande | n = 2 287 Schwangere (n = 113 Raucherinnen; M = 30,5 J.; SD = 5,6); (n = 290 Tabakentwöhnte; M = 30,6 J.; SD = 4,9); (n = 1 863 Nichtraucherinnen; M = 31,8 J.; SD = 4,4); (n = 124 Frauen mit fortgesetztem Alkoholkonsum; M = 32,8 J.; SD = 4,4); (n = 1 403 Alkoholverzichter (M = 31,7 J.; SD = 4,5); (n = 760 Abstinenzler; M = 31,2 J.; SD = 4,7) | prospektive populationsbasierte Kohortenstudie (PAD)            | 19. SSW 2011–2013                        | 28 % der Schwangeren setzen Nikotinkonsum fort; 8,1 % mit fortgesetztem Alkoholkonsum                                                                                                                            | Fortgesetzter Alkoholkonsum assoziiert mit folgenden Faktoren: Konflikte mit Angehörigen (OR = 10,4); strafatbezogene Ereignisse (OR = 35,7), schwangerschaftsspezifische Ereignisse (OR = 13,4) und Anzahl an stressigen Ereignissen (OR = 17,2). Keine Zusammenhänge mit Ängsten/ Depressionen.                                                                                                                                                                                                                         |

Fortsetzung nächste Seite

**Tab. 2** Befunde empirischer Studien zu Einflussfaktoren auf gesundheitsschädigende Verhaltensweisen und psychische Beeinträchtigungen von Schwangeren. (Fortsetzung)

| Autoren | Land                | Stichprobe                                                                                                                     | Studien-design                                                                     | Erhebungs-zeitpunkt                                                                                             | Häufigkeit                                                                                                         | Ergebnisse zu Einflussfaktoren                                                                                                                                                                                                                                                                                                                                                                                                                                                                                                                                                         |
|---------|---------------------|--------------------------------------------------------------------------------------------------------------------------------|------------------------------------------------------------------------------------|-----------------------------------------------------------------------------------------------------------------|--------------------------------------------------------------------------------------------------------------------|----------------------------------------------------------------------------------------------------------------------------------------------------------------------------------------------------------------------------------------------------------------------------------------------------------------------------------------------------------------------------------------------------------------------------------------------------------------------------------------------------------------------------------------------------------------------------------------|
| [53]    | Belgien             | n = 523 Schwangere (M = 29 J.; SD = 4,38)                                                                                      | prospektive Längsschnittstudie                                                     | t <sub>0</sub> : 16. SSW<br>t <sub>1</sub> : 32.–34. SSW<br>t <sub>2</sub> : 96 Wochen post partum<br>2008–2010 | 16,3 % der Schwangeren rauchen.                                                                                    | Raucherinnen berichten signifikant mehr depressive Symptome zu allen 3 Erhebungszeitpunkten im Vergleich zu Nichtraucherinnen und jenen, die das Rauchen aufgegeben haben.<br>Unterschiede zeigen sich vor allem bei Frauen mit geringem Bildungsstand.                                                                                                                                                                                                                                                                                                                                |
| [54]    | Norwegen            | n = 73 418 Schwangere (keine Angabe zum Alter)                                                                                 | prospektive populationsbasierte Kohortenstudie (MoBa)                              | t <sub>1</sub> : 17. und 30. SSW<br>t <sub>2</sub> : 6 Monate post partum<br>1999–2008                          | 27,5 % der Frauen rauchten vor der Schwangerschaft, von diesen setzten 44,2 % Nikotinkonsum fort.                  | Frauen mit hohen Angst- und Depressionswerten hören seltener mit Rauchen in der Schwangerschaft auf (OR = 0,80) und rauchen auch bereits vor der Schwangerschaft (OR = 1,45). Partnerschaftskonflikte (OR = 0,82) und negative Lebensereignisse (OR = 0,93) wirken sich ebenso ungünstig auf Einstellen des mütterlichen Nikotinkonsums aus.                                                                                                                                                                                                                                           |
| [55]    | Dänemark            | n = 3 238 Schwangere (M = 32 Jahre; SD = 5)                                                                                    | prospektive populationsbasierte Kohortenstudie (Copenhagen Pregnancy Cohort Study) | 10. SSW<br>2012–2013                                                                                            | 3 % der Frauen trinken wöchentlich Alkohol in Frühschwangerschaft; Binge-Drinking in Frühschwangerschaft bei 35 %. | Faktoren, die Binge-Drinking begünstigen: Alkoholkonsum vor der Schwangerschaft (ein Glas pro Woche: aOR = 4,48; 2–7 Gläser pro Woche: aOR = 10,23; ≥ 8 Gläser pro Woche: aOR = 33,18); Nikotinkonsum vor der Schwangerschaft (aOR = 2,24) und ungeplante Schwangerschaft (aOR = 2,74).                                                                                                                                                                                                                                                                                                |
| [56]    | Brasilien           | n = 1 744 Schwangere (n = 549 aus Niterói; 60,8 % zwischen 20–34 J.); (n = 1 195 aus Rio de Janeiro; 65,4 % zwischen 20–34 J.) | Querschnittstudie<br>Daten von 2011                                                | 12 h nach der Geburt<br>2011                                                                                    | 17,9 bis 24,8 % der Frauen rauchen in der Schwangerschaft.                                                         | Faktoren, die mit fortgesetztem Nikotinkonsum assoziiert sind: geringer Bildungsstand (OR = 2,14 Niterói; OR = 1,61 Rio de Janeiro); MehrgGebärende (OR = 3,48 Niterói; OR = 1,58 Rio de Janeiro).                                                                                                                                                                                                                                                                                                                                                                                     |
| [57]    | Russland (Murmansk) | n = 12 871 Schwangere<br>34,9 % im Alter zwischen 20–24 J., 29,4 % zwischen 25–29 J., 16,6 % zwischen 30–34 J.)                | populationsbasierte Querschnittstudie                                              | Befragungen während des Aufenthalts in Geburtsklinik<br>2006–2011                                               | 25,2 % Frauen rauchen vor Schwangerschaft und 18,9 % der Frauen in der Schwangerschaft.                            | Faktoren, die Nikotinkonsumverzicht begünstigen: Jüngere Frauen (≤ 20–24 Jahre: OR = 1,19) reduzieren eher Nikotinkonsum als ältere Frauen (30–34 Jahre: OR = 0,98; ≥ 35 Jahre: OR = 0,82); Erst- oder Zweitgebärende eher als MehrgGebärende (keine Kinder: OR = 2,21 oder bereits ein Kind: OR = 1,69). Faktoren, die sich ungünstig auf Nikotinkonsumverzicht auswirken: niedriger Bildungsstand (OR = 0,39); Familienstand (Alleinstehende: OR = 0,53 oder mit Partner: OR = 0,49), Wohnort (ländliches Gebiet: OR = 0,76) und Ethnizität (nicht-russische Ethnizität: OR = 0,90). |
| [58]    | USA                 | n = 902 Schwangere (M = 24,8 J.; SD = 5,9)                                                                                     | Querschnittstudie                                                                  | 1. Termin der Schwangerenvorsorge (M = 15,1 SSW; SD = 8,3)<br>2009–2011                                         | 17 % der Schwangeren rauchen zum Zeitpunkt des Vorsorgetermins.                                                    | Faktoren, die mit fortgesetztem Nikotinkonsum assoziiert sind: Alter der Frau (OR = 1,08); niedriger Bildungsstand (OR = 4,30); keine Erwerbstätigkeit (OR = 2,33); kriminelles Verhalten (OR = 1,66); Sozialhilfeempfängerin (OR = 2,26); Alkoholkonsum (OR = 2,73) und Konsum illegaler Drogen (OR = 1,97) in der Schwangerschaft.                                                                                                                                                                                                                                                   |
| [59]    | USA                 | n = 1 518 Schwangere (73,1 % im Alter zwischen 20–34 J.)                                                                       | Querschnittstudie                                                                  | zw. 18. und 28. SSW                                                                                             | 17,6 % Frauen rauchen in der Schwangerschaft.                                                                      | Faktoren, die mit fortgesetztem Nikotinkonsum assoziiert sind: höher wahrgenommener Stress (OR = 1,76); Depression (OR = 1,48); Neurotizismus (OR = 1,58); negatives Partnerverhalten (Kontrolle, Kritik, Missbrauch) (OR = 1,15) und wahrgenommener Rassismus (OR = 1,15) sind mit Nikotinkonsum assoziiert.                                                                                                                                                                                                                                                                          |

Fortsetzung nächste Seite

**Tab. 2** Befunde empirischer Studien zu Einflussfaktoren auf gesundheitsschädigende Verhaltensweisen und psychische Beeinträchtigungen von Schwangeren. (Fortsetzung)

| Autoren | Land       | Stichprobe                                                                                                          | Studien-design                        | Erhebungs-zeitpunkt                            | Häufigkeit                                                                                                                                                                                                                                                                                                                                                                                      | Ergebnisse zu Einflussfaktoren                                                                                                                                                                                                                                                                                                                                                                                                                                                                                                                                                                                                                                                                                                                                                                                                                                                                                                                                                                                                                                                                                                                                                                                      |
|---------|------------|---------------------------------------------------------------------------------------------------------------------|---------------------------------------|------------------------------------------------|-------------------------------------------------------------------------------------------------------------------------------------------------------------------------------------------------------------------------------------------------------------------------------------------------------------------------------------------------------------------------------------------------|---------------------------------------------------------------------------------------------------------------------------------------------------------------------------------------------------------------------------------------------------------------------------------------------------------------------------------------------------------------------------------------------------------------------------------------------------------------------------------------------------------------------------------------------------------------------------------------------------------------------------------------------------------------------------------------------------------------------------------------------------------------------------------------------------------------------------------------------------------------------------------------------------------------------------------------------------------------------------------------------------------------------------------------------------------------------------------------------------------------------------------------------------------------------------------------------------------------------|
| [60]    | Kanada     | n = 2 246 Schwangere (71,5 % im Alter zwischen 25–34 J.)                                                            | prospektive Kohortenstudie (AOB) 2008 | < 25 SSW<br>34–36. SSW<br>4 Monate post partum | 46 % der Frauen setzen Alkoholkonsum nach Gewährwerden der Schwangerschaft fort; zumeist geringe (< 1 Getränk pro Gelegenheit an ≤ 7 Tagen pro Woche) bis moderate Alkoholmengen (1 Getränk pro Gelegenheit an ≤ 7 Tagen pro Woche oder 2 Getränke pro Gelegenheit an ≤ 3 Tagen pro Woche); 13 % zeigen Binge-Drinking-Verhalten (5 oder mehr Getränke pro Gelegenheit) in Frühschwangerschaft. | Prädiktoren für Binge-Drinking vor Gewährwerden der Schwangerschaft: geringer Bildungsstand (OR = 3,61); Erstgebärende (OR = 1,62); ungeplante Schwangerschaft (OR = 1,93); Nikotinkonsum (OR = 1,90) sowie Binge-Drinking 12 Monate vor der Schwangerschaft (OR = 10,83); geringer dispositioneller Optimismus (OR = 1,73).<br>Prädiktoren für geringen bis moderaten Alkoholmengen nach Gewährwerden der Schwangerschaft: ungeplante Schwangerschaft (OR = 1,91); präkonzeptioneller BMI < 25,0 kg/m <sup>2</sup> (OR = 1,41); Nikotinkonsum (OR = 1,90) sowie Binge-Drinking 12 Monate vor der Schwangerschaft (OR = 2,62).                                                                                                                                                                                                                                                                                                                                                                                                                                                                                                                                                                                      |
| [61]    | Frankreich | n = 18 014 Schwangere (14,2 % < 25 J., 31,3 % im Alter zwischen 25–29 J., 33,3 % zwischen 30–34 J., 21,3 % ≥ 35 J.) | Geburtskohortenstudie (ELFE Study)    | keine Angabe 2011                              | Nikotinkonsum: 21,7 %<br>Alkoholkonsum: 34,8 % (Binge-Drinking: 3,4 %)<br>Frauen mit Migrationshintergrund konsumieren seltener Nikotin (8,8 vs. 21,9 %) und Alkohol (23,4 vs. 40,7 %); keine Unterschiede im Binge-Drinking (2,9 vs. 3,3 %).                                                                                                                                                   | 1. Faktoren, die mit fortgesetztem Nikotinkonsum assoziiert sind:<br>allgemeine Faktoren: Alter ≤ 25 Jahren; Alleinerziehende; unvollständige Schwangerschaftsvorsorge.<br>Raucherinnen ohne Migrationshintergrund haben einen niedrigen Bildungsstand (Realschulabschluss: OR = 3,09) und sind nicht erwerbstätig (OR = 1,45); schwächere bzw. inverse Zusammenhänge bei Frauen mit Migrationshintergrund (Realschulabschluss: OR = 1,86; keine Erwerbstätigkeit: OR = 0,68); jedoch psychologische Probleme (OR = 1,95) und komorbider Alkoholkonsum (OR = 1,92) stärker mit Nikotinkonsum bei Frauen mit Migrationshintergrund assoziiert.<br>2. Faktoren, die mit fortgesetztem Alkoholkonsum assoziiert sind:<br>allgemeine Faktoren: Alter der Frauen ≥ 25 Jahre; hoher Bildungsstand und Erwerbstätigkeit; mehr als eine vorausgegangene Geburt.<br>Migrationsspezifische Faktoren: Alleinlebende (OR = 2,12); psychische Probleme (OR = 1,46).<br>Binge-Drinking assoziiert mit Alter ≥ 35 Jahren (OR = 1,89) und hohem Schulabschluss (OR = 1,32) bei Frauen ohne Migrationshintergrund.<br>Migrationsspezifische Risikofaktoren für Binge-Drinking: Alleinlebende (OR = 2,78); Nikotinkonsum (OR = 4,04). |
| [62]    | Irland     | n = 907 Schwangere (25,9 % im Alter zwischen 25–29 J., 36,8 % zwischen 30–34 J., 20,7 % zwischen 35–39 J.)          | prospektive Kohortenstudie            | 10.–14. SSW<br>28. SSW<br>Geburt<br>2010–2011  | 30 % rauchten in den letzten 6 Monaten vor der Schwangerschaft; 41 % der Raucherinnen setzten Konsum in der Schwangerschaft fort.                                                                                                                                                                                                                                                               | Schwangere Raucherinnen unterscheiden sich von Nichtraucherinnen in den folgenden Merkmalen:<br>irische Nationalität (OR = 3,23); ungeplante Schwangerschaft (OR = 1,90); jüngeres Alter (für 30–39 Jahre: OR = 0,50); Alkoholkonsum im 1. Trimester (OR = 3,38) und vorausgegangener Konsum illegaler Drogen (OR = 3,56).                                                                                                                                                                                                                                                                                                                                                                                                                                                                                                                                                                                                                                                                                                                                                                                                                                                                                          |

Fortsetzung nächste Seite

**Tab. 2** Befunde empirischer Studien zu Einflussfaktoren auf gesundheitsschädigende Verhaltensweisen und psychische Beeinträchtigungen von Schwangeren. (Fortsetzung)

| Autoren | Land                               | Stichprobe                                                                                | Studien-design                     | Erhebungs-zeitpunkt                                                                | Häufigkeit                                                                                                                                                                                                       | Ergebnisse zu Einflussfaktoren                                                                                                                                                                                                                                                                                                                                                                                                                                                                                                                                                                                                                                                                                                                                                                                                                                                                                                               |
|---------|------------------------------------|-------------------------------------------------------------------------------------------|------------------------------------|------------------------------------------------------------------------------------|------------------------------------------------------------------------------------------------------------------------------------------------------------------------------------------------------------------|----------------------------------------------------------------------------------------------------------------------------------------------------------------------------------------------------------------------------------------------------------------------------------------------------------------------------------------------------------------------------------------------------------------------------------------------------------------------------------------------------------------------------------------------------------------------------------------------------------------------------------------------------------------------------------------------------------------------------------------------------------------------------------------------------------------------------------------------------------------------------------------------------------------------------------------------|
| [63]    | Irland                             | n = 6 725 Schwangere                                                                      | Querschnitt-studie                 | ab der 12. SSW                                                                     | 5% der Schwangere konsumieren Alkohol; davon konsumieren 92% weniger als 5 Gläser Alkohol pro Woche; 8% trinken zw. 6 bis ≥ 20 Gläser Alkohol pro Woche.                                                         | Schwangere mit fortgesetztem Alkoholkonsum in der Frühschwangerschaft weisen folgende Merkmale auf: höheres Alter der Mutter (30–39 Jahre: OR = 1,64 und > 40 Jahre: OR = 3,27); irische Nationalität (OR = 3,05); zeitgleicher Nikotinkonsum (OR = 2,58) und vorausgegangener Konsum illegaler Drogen (OR = 2,67).                                                                                                                                                                                                                                                                                                                                                                                                                                                                                                                                                                                                                          |
| [64]    | UK, Irland, Australien, Neuseeland | n = 17 244 Frauen                                                                         | GUI, PRAMS Ireland und SCOPE       | GUI: 2008–2009<br>PRAMS: Geburtenregister 2012<br>SCOPE: 15. und 20. SSW 2004–2011 | Alkoholkonsum: 20% (GUI) bis zu 82% (SCOPE); 1–2 Gläser Alkohol in der Woche von 30% (SCOPE) bis 85% (PRAMS) der Frauen berichtet.                                                                               | Prädiktor für Alkoholkonsum: zeitgleicher Nikotinkonsum in der Schwangerschaft: SCOPE: RR = 1,17; GUI: RR = 1,50; PRAMS: RR = 1,42.                                                                                                                                                                                                                                                                                                                                                                                                                                                                                                                                                                                                                                                                                                                                                                                                          |
| [65]    | Australien                         | n = 1 591 Schwangere (61,3% im Alter zwischen 25–29 J.)                                   | prospektive Kohortenstudie (ALSWH) | keine genaue Angabe 2000, 2003, 2006                                               | 72,7% der Frauen konsumieren Alkohol in der Schwangerschaft (zumeist 1–2 Getränke pro Gelegenheit); 1,8% der Frauen rauchen in der Schwangerschaft. Zeitgleicher Nikotin- und Alkoholkonsum bei 8,2% der Frauen. | Frauen, die mehr als 2 alkoholische Getränke pro Tag konsumieren oder mehr als einmal pro Woche trinken, reduzieren eher Alkoholkonsum. Nikotinverzicht wird erschwert bei finanziellen Schwierigkeiten (RR = 0,78); Gewalt durch Partner (RR = 0,76); Mehrgebärende (RR = 0,87) und bei präkonzeptionellem Nikotinkonsum von mehr als 10 Zigaretten pro Tag (RR = 0,75). Abnahme des zeitgleichen Nikotin- und Alkoholkonsums sign. höher bei Frauen, die mind. 12 Jahre zur Schule gingen (RR = 1,5–1,6); die mindestens 1- bis 2-mal pro Tag/Woche Alkohol vor der Schwangerschaft tranken (RR = 1,5–1,6) und die 3 oder mehr alkoholische Getränke pro Gelegenheit konsumierten (RR = 1,6–1,8) und sign. geringer bei Frauen, die mehr als 10 Zigaretten rauchten; bei Frauen mit bereits vorhandenen Kindern (RR = 0,79) sowie bei Frauen mit finanziellen Schwierigkeiten (RR = 0,74) und Gewalterfahrungen durch Partner (RR = 0,71). |
| [66]    | Schweden                           | n = 1 594 Schwangere (32,8% im Alter zwischen 25–29 J., 34,2% im Alter zwischen 30–34 J.) | Querschnittstudie                  | ≥ 18. SSW 2009–2010                                                                | 6% der Schwangere trinken mind. 1-mal pro Woche.                                                                                                                                                                 | Faktoren, die mit fortgesetztem Alkoholkonsum assoziiert sind: zunehmendes Alter der Frauen (30–34 Jahre: OR = 4,54; 35–39 Jahre: OR = 8,51; ≥ 40 Jahre: OR = 11,32); Wohnort (Großstadt: OR = 1,69); täglicher Nikotinkonsum vor Schwangerschaft (OR = 3,76); geringe soziale Unterstützung (OR = 0,86); Trinkgewohnheiten (OR = 0,86); soziale Trinkmotive (OR = 1,12).                                                                                                                                                                                                                                                                                                                                                                                                                                                                                                                                                                    |
| [67]    | 15 Länder                          | n = 8 344 Schwangere und Mütter von Kleinkindern unter einem Jahr                         | Querschnittstudie                  | keine Angabe 2011–2012                                                             | 35,3% der Frauen rauchen vor und 26,2% in der Schwangerschaft.                                                                                                                                                   | Faktoren, die mit fortgesetztem Nikotinkonsum assoziiert sind: Unverheiratete (aOR = 1,75); geringer Schulabschluss (aOR = 3,64); Hausfrauenstatus (aOR = 1,43); bereits vorhandene Kinder (aOR = 1,24); ungeplante Schwangerschaft (aOR = 1,31); keine Einnahme von Folsäure (aOR = 1,59); geringe Gesundheitskenntnisse (aOR = 1,43)                                                                                                                                                                                                                                                                                                                                                                                                                                                                                                                                                                                                       |

Fortsetzung nächste Seite

**Tab. 2** Befunde empirischer Studien zu Einflussfaktoren auf gesundheitsschädigende Verhaltensweisen und psychische Beeinträchtigungen von Schwangeren. (Fortsetzung)

| Autoren                                         | Land        | Stichprobe                                                                                                          | Studien-design                                   | Erhebungs-zeitpunkt                                         | Häufigkeit                                                                                                                                          | Ergebnisse zu Einflussfaktoren                                                                                                                                                                                                                                                                                                                                                                                                                                                                                                              |
|-------------------------------------------------|-------------|---------------------------------------------------------------------------------------------------------------------|--------------------------------------------------|-------------------------------------------------------------|-----------------------------------------------------------------------------------------------------------------------------------------------------|---------------------------------------------------------------------------------------------------------------------------------------------------------------------------------------------------------------------------------------------------------------------------------------------------------------------------------------------------------------------------------------------------------------------------------------------------------------------------------------------------------------------------------------------|
| [68]                                            | 15 Länder   | n = 4 295 Schwangere                                                                                                | Querschnitt-studie                               | keine Angabe 2011–2012                                      | 34,5 % der Frauen rauchten vor und 26,4 % setzen Nikotinkonsum in der Schwangerschaft fort.                                                         | Faktoren, die mit fortgesetztem Nikotinkonsum assoziiert sind:<br>Frauen, die während der Schwangerschaft weiterauchen, sind häufiger depressiv als Frauen, die mit dem Rauchen aufhören (32,5 vs. 18,9 %; $p < 0,001$ ).<br>Prädiktoren des fortgesetzten Nikotinkonsums:<br>geringer Bildungsstand (OR = 4,46); Depression (OR = 2,02).                                                                                                                                                                                                   |
| <b>Ernährung und Gewichtszunahme/Adipositas</b> |             |                                                                                                                     |                                                  |                                                             |                                                                                                                                                     |                                                                                                                                                                                                                                                                                                                                                                                                                                                                                                                                             |
| [69]                                            | Niederlande | n = 144 Schwangere (M = 31,2 J.; SD = 4,7)                                                                          | prospektive Studie                               | 30. SSW (M = 30,4 SSW; SD = 1,9) 2003–2007                  | 38 % der Schwangeren stärkere Gewichtszunahme als empfohlen (vor allem übergewichtige und adipöse Frauen)                                           | Prädiktoren für exzessive Gewichtszunahme: präkonzeptionelles Übergewicht (OR = 6,33); geringe physikalische Aktivität (OR = 3,96); hoher Nahrungsmittelverzehr (OR = 3,14). Reduktion des Risikos bei mehr als 9 h Schlaf (OR = 0,35).                                                                                                                                                                                                                                                                                                     |
| [70]                                            | USA         | n = 1 100 Schwangere                                                                                                | Querschnitt-studie (WISH)                        | 32.–36. SSW                                                 | 14 % der Schwangeren mit inadäquater und 53 % mit exzessiver Gewichtszunahme                                                                        | Prädiktoren für exzessive Gewichtszunahme: präkonzeptionelles Übergewicht (OR = 2,26); Erstgebärende vs. Frauen mit mehreren vorausgegangenen Geburten (OR = 1,4).<br>Prädiktoren für inadäquate Gewichtszunahme: chronischer bzw. Gestationsdiabetes (OR = 2,70); hoher vs. niedriger Konsum von Milcherzeugnissen (OR = 1,74); Erstgebärende vs. Frauen mit mehreren vorausgegangenen Geburten (OR = 0,62).                                                                                                                               |
| [71]                                            | USA         | n = 770 latein-amerikanische Schwangere (35 % < 20 J.; 37,4 % im Alter zwischen 20–24 J.; 17,9 % zwischen 25–29 J.) | prospektive Kohorten-studie                      | M = 15. SSW                                                 | 22 % der Schwangeren mit inadäquater und 45 % mit exzessiver Gewichtszunahme                                                                        | Prädiktoren für exzessive Gewichtszunahme: Frauen über 30 J. OR = 2,5 im Vergleich zu 20–24-Jährigen; Übergewichtige im Vergleich zu Normalgewichtigen (OR = 2,2).<br>Geringeres Risiko für Frauen, die bereits mehr als 2 Kinder geboren haben (OR = 0,2) und mit einem Aufenthalt weniger als 10 Jahre in USA (OR = 0,5).                                                                                                                                                                                                                 |
| [72]                                            | Niederlande | n = 6 959 Schwangere (M = 30,3 J.; Range: 20,4–37,9 J.)                                                             | prospektive Kohorten-studie (Generation R Study) | keine Angabe zum Zeitpunkt in der Schwangerschaft 2001–2005 | 16,2 % untergewichtige Schwangere, 55,8 % normalgewichtig, 19,2 % übergewichtig, 8,8 % adipös 44,5 % der Schwangeren mit exzessiver Gewichtszunahme | Faktoren, die Adipositas begünstigen: geringes Bildungsniveau der Mutter (OR = 2,48); Haushaltseinkommen < 1 600 Euro (OR = 1,36); Mehrgebärende (OR = 1,68).<br>Risikofaktoren für exzessive Gewichtszunahme: europäische Ethnizität (Ref.: nichteuropäische Ethnizität, OR = 0,78); Erstgebärende (Ref.: Mehrgebärende, OR = 0,71); höhere Energiezufuhr (OR = 1,13); Nikotinkonsum in der Schwangerschaft (OR = 2,08); BMI des Vaters ist Risikofaktor für mütterliche Adipositas (OR = 1,53) und exzessive Gewichtszunahme (OR = 1,12). |
| [73]                                            | USA         | n = 94 Schwangere (73 % < 25 J.)                                                                                    | prospektive Kohorten-studie                      | M = 21. SSW 2008                                            | 60 % Übergewichtige und 41 % der Schwangeren mit exzessiver Gewichtszunahme                                                                         | Prädiktoren für exzessive Gewichtszunahme: präkonzeptionelles Übergewicht bzw. Adipositas (BMI $\geq 25$ : aOR = 4,20); erstgebärend (aOR = 3,35).<br>Fernsehkonsument mit weniger als 2 h (aOR = 0,18) und fortgesetzte körperliche Aktivität (aOR = 0,35) mit geringerem Risiko für exzessive Gewichtszunahme assoziiert.                                                                                                                                                                                                                 |

Fortsetzung nächste Seite

**Tab. 2** Befunde empirischer Studien zu Einflussfaktoren auf gesundheitsschädigende Verhaltensweisen und psychische Beeinträchtigungen von Schwangeren. (Fortsetzung)

| Autoren | Land       | Stichprobe                                                              | Studien-design                    | Erhebungs-zeitpunkt                                                                                                                                                      | Häufigkeit                                                                                                                                 | Ergebnisse zu Einflussfaktoren                                                                                                                                                                                                                                                                                                                                                          |
|---------|------------|-------------------------------------------------------------------------|-----------------------------------|--------------------------------------------------------------------------------------------------------------------------------------------------------------------------|--------------------------------------------------------------------------------------------------------------------------------------------|-----------------------------------------------------------------------------------------------------------------------------------------------------------------------------------------------------------------------------------------------------------------------------------------------------------------------------------------------------------------------------------------|
| [74]    | USA        | n = 3 006 Schwangere (M = 27,0 Jahre; SD = 5,9)                         | prospektive Kohortenstudie        | 34. SSW 2009–2011                                                                                                                                                        | 78,7 % der übergewichtigen, 65 % der adipösen und 42,4 % der normalgewichtigen Schwangeren überschreiten Empfehlungen zur Gewichtszunahme. | Prädiktoren für exzessive Gewichtszunahme: ältere Frauen (30 bis 36 J.: aOR = 1,45); unverheiratet mit Partner zusammenlebend (aOR = 1,48) oder ohne Partner (aOR = 1,46); Übergewicht (aOR = 5,11) und Adipositas (aOR = 2,35); Raucherstatus (aOR = 1,49). körperliche Aktivität von mindestens 150 min pro Woche vermindert Risiko für exzessive Gewichtszunahme.                    |
| [75]    | USA        | n = 2 994 (n = 855 Erstgebärende; n = 2 139 Mehrgebärende)              | Querschnittstudie (IFPS II)       | vor Geburt des Kindes 2005–2007                                                                                                                                          |                                                                                                                                            | Prädiktoren für exzessive Gewichtszunahme/Adipositas: Erstgebärende nehmen signifikant mehr an Gewicht zu als Mehrgebärende; Mehrgebärende sind im Vergleich zu Erstgebärenden häufiger übergewichtig oder adipös.                                                                                                                                                                      |
| [76]    | USA        | n = 279 Schwangere (M = 27,0 Jahre; SD = 5,9)                           | prospektive Längsschnittstudie    | t <sub>1</sub> : 10.–22. SSW (M = 16,6 SSW; SD = 4,4)<br>t <sub>2</sub> : 21.–30. SSW (M = 26,1 SSW; SD = 3,8)<br>t <sub>3</sub> : nach 30. SSW (M = 34,1 SSW; SD = 2,4) |                                                                                                                                            | Schwangerschaftsspezifischer Stress ist Prädiktor für folgende gesundheitsschädigenden Verhaltensweisen: Nikotinkonsum (B = 0,22); Koffeinkonsum (B = 0,16); ungesunde Ernährung (B = 0,29).                                                                                                                                                                                            |
| [77]    | UK, Kanada | n = 2 282 Schwangere (M = 29,6 J.; SD = 5,0)                            | Querschnittstudie                 | keine Angabe                                                                                                                                                             |                                                                                                                                            | Prädiktoren für ungesunde Ernährungsweise: Migrationsstatus, unverheiratete Frauen jedoch mit fester Partnerschaft; Erstgebärende; geringe körperliche Aktivität; Raucherinnen; höhere Angstwerte; Mangel an familiärer Unterstützung.                                                                                                                                                  |
| [78]    | Italien    | n = 2 189 Schwangere (M = 33 J.)                                        | Querschnittstudie                 | keine Angabe zum Zeitpunkt in der Schwangerschaft 2012                                                                                                                   | präkonzeptionelle Folsäureeinnahme bei 23,5 %                                                                                              | Prädiktoren für Folsäureeinnahme: höheres Alter (35–39 J.: aPR = 1,05); höheres Bildungsniveau (Universitätsabschluss: aPR = 1,90), verheiratet/in Partnerschaft (aPR = 1,44); geplante Schwangerschaft (aPR = 2,4); chronische Erkrankung (aPR = 1,22)<br>Prädiktoren für mangelnde Folsäureeinnahme: Alter unter 25 J. (aPR = 0,31); mehr als 3 vorausgegangene Geburten (aPR = 0,66) |
| [79]    | Norwegen   | n = 225 000 Schwangere (Alter zur Geburt: 72,4 % zwischen 25 bis 34 J.) | prospektive Kohortenstudie (MoBa) | 17.–18. SSW 2000–2003                                                                                                                                                    | 11,8 % 2 Monate vor Schwangerschaft auf 46,9 % im 3. Schwangerschaftsmonat                                                                 | Prädiktoren für Folsäureeinnahme: höheres Bildungsniveau (aRR = 4,1); höheres Alter (Alter ab 25–34 J.: aRR = 1,6); höheres Einkommen (aRR = 1,3); Verheiratete (aRR = 2,4); geplante Schwangerschaft.<br>Prädiktoren für mangelnde Folsäureeinnahme: Nikotinkonsum (aRR = 0,6); Anzahl vorausgegangener Geburten (< 2: aRR = 0,8).                                                     |

Fortsetzung nächste Seite

**Tab. 2** Befunde empirischer Studien zu Einflussfaktoren auf gesundheitsschädigende Verhaltensweisen und psychische Beeinträchtigungen von Schwangeren. (Fortsetzung)

| Autoren | Land                                | Stichprobe                                                                                                                                                    | Studien-design                                     | Erhebungs-zeitpunkt                                                 | Häufigkeit                                                                                                                                                                                                                                              | Ergebnisse zu Einflussfaktoren                                                                                                                                                                                                                                                                                                                                                                                                                                                                                                                                                                                                                                                                                                                                    |
|---------|-------------------------------------|---------------------------------------------------------------------------------------------------------------------------------------------------------------|----------------------------------------------------|---------------------------------------------------------------------|---------------------------------------------------------------------------------------------------------------------------------------------------------------------------------------------------------------------------------------------------------|-------------------------------------------------------------------------------------------------------------------------------------------------------------------------------------------------------------------------------------------------------------------------------------------------------------------------------------------------------------------------------------------------------------------------------------------------------------------------------------------------------------------------------------------------------------------------------------------------------------------------------------------------------------------------------------------------------------------------------------------------------------------|
| [80]    | Däne-mark                           | n = 60 892 Schwangere                                                                                                                                         | prospektive Kohorten-studie (DNBC)                 | 16. und 18. SSW<br>6 und 18 Monate post partum<br>1996–2002         | 4,3 % Untergewich-tige; 68,3 % Normalgewichtige; 19,5 % Übergewich-tige; 7,9 % Adipöse<br>21,9 % der Gesamt-stichprobe mit ex-zessiver Gewichts-zunahme.<br>Inadäquate Gewichtszunahme eher bei überge-wichtigen (17,7 %) und adipösen Frauen (42,0 %). | Unter- und übergewichtige sowie adipöse Schwangere sind etwas jünger und eher Mehrgebärende im Vergleich zu normal-gewichtigen Schwangeren.<br>Einflussfaktoren auf inadäquate Gewichts-zunahme (< 10 kg):<br>höheres Alter (≥ 35 J.); niedriger sozialer Sta-tus; kleine Statur; Mehrgebärende;<br>Konsum von mehr als 10 Zigaretten pro Tag und mehr als 3 alkoholischen Getränken in der Schwangerschaft.<br>Einflussfaktoren auf höhere bis exzessive Gewichtszunahme (16–19 bzw. mehr als 20 kg):<br>Alter unter 30 Jahren und Erstgebärende; niedriger sozialer Status; größere Statur; Konsum von weniger als 10 Zigaretten pro Tag; kein Alkoholkonsum in der Schwanger-schaft; Bewegungsmangel.                                                          |
| [81]    | UK                                  | n = 12 053 Schwangere (39,1 % < 20 J., 39 % im Alter zwischen 20–24 J., 17,9 % zwischen 25–29 J.)                                                             | prospektive Kohorten-studie (ALSPAC)               | 8., 18. und 32. SSW<br>1991–1992                                    |                                                                                                                                                                                                                                                         | Prädiktoren für Ernährungsweise: gesundheitsbewusste Ernährungsweise positiv assoziiert mit höherem Bildungsstand und Alter. Negative Zusammenhänge mit zunehmender Parität, alleinstehend; Erwerbslosigkeit; Raucherstatus und präkonzeptionellem Übergewicht.<br>Traditionelle Ernährungsweise (z. B. Verzehr von britischem Fleisch, Kartoffeln, grünem Gemüse usw.) assoziiert mit Bewegung; präkonzeptionellem Übergewicht und zunehmender Parität.<br>Verzehr fetthaltiger Lebensmittel (z. B. Pizza, Chips) assoziiert mit jungem Alter, niedrigem Bildungsniveau; finanziellen Schwierigkeiten; Raucherstatus, zunehmender Parität.<br>Verzehr zuckerhaltiger Lebensmittel asso-ziiert mit jungem Alter; Ethnizität, höheren Angstwerten; Mehrgebärenden. |
| [82]    | Frank-reich                         | n = 903 Schwangere (M = 31,7 J.; SD = 4,7)                                                                                                                    | prospektive Kohorten-studie (NutriNet-Santé Study) | 31 % im 1. Tri-mester, 36 % im 2. und 33 % im 3. Tri-mester<br>2009 | 64,9 % der Schwan-geren nehmen Nahrungsergän-zungspräparate ein (z. B. 45 % Folsäure-, 42,1 % Eisen- und 15,5 % Vitamin-D-Präparate).                                                                                                                   | Faktoren, die Einnahme von Nahrungs-ergänzungsmitteln begünstigen:<br>höheres Alter (aOR = 1,06) und Einkommen (> 3 130 Euro pro Monat: aOR = 2,09).<br>Faktoren, die mit mangelnder Einnahme assoziiert sind:<br>Berufsgruppe (Arbeiterinnen aOR = 0,42; Arbeitslose: aOR = 0,45); Mehrgebärende (aOR = 0,52).                                                                                                                                                                                                                                                                                                                                                                                                                                                   |
| [83]    | Austra-lien, Neu-seeland und Irland | n = 1 950 Erstgebä-rende (Australien n = 475; M = 24,3 J.; SD = 5,0); (Neu-seeland n = 264; M = 30,4 J.; SD = 4,9); (Irland n = 1 211; M = 29,9 J.; SD = 4,5) | SCOPE                                              | 14.–16. SSW                                                         | 17 % Schwangere mit adäquater Gewichtszunahme, 74 % mit exzessiver und 9 % mit inadä-quater Gewichts-zunahme.                                                                                                                                           | Faktoren, die exzessive Gewichtszunahme begünstigen:<br>jüngeres Alter der Mutter (≤ 24 J.: aOR = 1,92; 25–29 Jahre: aOR = 1,88 und 30–34 Jahre: aOR = 1,59); irische Nationalität (aOR = 2,31); präkonzeptionelles Übergewicht (aOR = 2,9) oder Adipositas (aOR = 2,5); hohes Geburts-gewicht der Mutter (aOR = 1,15); Tabak-entwöhnung in 14.–16. SSW (aOR = 1,67); Migrationsstatus (aOR = 1,57); nächtliche Schlafdauer ≥ 10 h (aOR = 1,83); geringe Bewegung um die 14.–16. SSW (aOR = 1,30).                                                                                                                                                                                                                                                                |

Fortsetzung nächste Seite

**Tab. 2** Befunde empirischer Studien zu Einflussfaktoren auf gesundheitsschädigende Verhaltensweisen und psychische Beeinträchtigungen von Schwangeren. (Fortsetzung)

| Autoren | Land        | Stichprobe                                                                                                      | Studien-design                                         | Erhebungs-zeitpunkt                                    | Häufigkeit                                             | Ergebnisse zu Einflussfaktoren                                                                                                                                                                                                                                                                                                                                                                                                                                                                                                                                                                                                                                                                                                                                                                                                                                                                 |
|---------|-------------|-----------------------------------------------------------------------------------------------------------------|--------------------------------------------------------|--------------------------------------------------------|--------------------------------------------------------|------------------------------------------------------------------------------------------------------------------------------------------------------------------------------------------------------------------------------------------------------------------------------------------------------------------------------------------------------------------------------------------------------------------------------------------------------------------------------------------------------------------------------------------------------------------------------------------------------------------------------------------------------------------------------------------------------------------------------------------------------------------------------------------------------------------------------------------------------------------------------------------------|
| [84]    | USA         | n = 1 777 Schwangere (M = 32,4 J.; SD = 4,9); 49% mit 1. Geburt                                                 | prospektive Studie                                     | 1. Vorsorgetermin (M = 11,7 SSW; SD = 3,1) 26.–28. SSW |                                                        | Prädiktoren einer geringeren Ernährungsqualität: jüngere Frauen; niedrigeres Bildungsniveau; höherer präkonzeptioneller BMI; höhere Anzahl von bisherigen Geburten.                                                                                                                                                                                                                                                                                                                                                                                                                                                                                                                                                                                                                                                                                                                            |
| [85]    | USA         | n = 795 Schwangere (n = 355 ≤ 25 J.; n = 20 bis 35 J.; n = 63 ≥ 35 J.)                                          | Querschnittstudie                                      | 2003–2012                                              |                                                        | Prädiktoren für ungesündere Ernährungsweise: präkonzeptionelles Übergewicht (aOR = 3,8) und Adipositas (aOR = 5,4). Signifikante höhere Werte im HEI-2010 bei Frauen mit höherem Einkommen; höherem Bildungsniveau; Alter ≤ 35 J.; Verheirateten und Nichtraucherinnen.                                                                                                                                                                                                                                                                                                                                                                                                                                                                                                                                                                                                                        |
| [86]    | Niederlande | n = 6 959 Schwangere (4,0% < 20 J., 43,1% im Alter zwischen 20–29,9 J., 37,9% zwischen 30–35 J.; 15,0% > 30 J.) | prospektive Kohortenstudie (Generation R Study)        | Median: 14,4 SSW 2002–2006                             | 37% adäquate Einnahme von Folsäure vor Schwangerschaft | Prädiktoren für inadäquate Folsäureeinnahme: geringes Bildungsniveau (aOR = 2,5); jüngeres Alter (< 20 J.: aOR = 1,5; 20–29,9 J. aOR = 1,4); alleinstehend (aOR = 2,0); nicht westeuropäische Ethnizität (aOR = 3,5); Nikotin- (aOR = 2,3) und Alkoholkonsum in der Schwangerschaft (aOR = 1,5); ungeplante Schwangerschaft (aOR = 9,5); Mehrggebärende (aOR = 1,6).                                                                                                                                                                                                                                                                                                                                                                                                                                                                                                                           |
| [87]    | Neuseeland  | n = 5 664 Schwangere (Median: 31 J.; Range: 15–47 J.)                                                           | prospektive Kohortenstudie (Growing up in New Zealand) | 3. Trimester 2009–2010                                 |                                                        | Prädiktoren für Ernährungsweise: Junk-Food-Ernährung assoziiert mit jüngerem Alter; niedrigem Bildungsniveau; geringer selbstwahrgenommener Gesundheit und depressiven Symptomen; fortgesetztem Nikotin- und Alkoholkonsum sowie mangelnder Folsäureeinnahme. Höhere Werte in gesunder Ernährungsweise assoziiert mit zunehmenden Alter (> 40 J.); bessere selbstwahrgenommene Gesundheit; geringerem präkonzeptionellem BMI; Bewegung und Nichtraucherstatus. Traditionelle Ernährung (Verzehr von Milch, weißem Brot usw.) assoziiert mit jüngerem Alter; niedrigem Bildungsniveau; sozioökonomischer Benachteiligung; fortgesetztem Nikotinkonsum; mangelnder Folsäureeinnahme; ungeplante Schwangerschaft; Mehrggebärende. Hoher Verzehr von proteinhaltigen Lebensmitteln assoziiert mit höherem Alter; bessere selbstwahrgenommene Gesundheit; Nikotinverzicht; Bewegung; Erstgebärende. |

Anmerkungen: ALSPAC: Avon Longitudinal Study of Parents and Children. ALSWH: Australian Longitudinal Study on Woman's Health. AOB: All Our Babies. aOR: adjustierte Odds Ratio. aPR: adjustierte Prävalenz-Ratio. B: Koeffizient. DNBC: Danish National Birth Cohort. GUL: Growing up in Ireland. HEI-2010: Healthy-Eating-Index 2010. IFPS II: Infant Feeding Practices Study II. J.: Jahre. M: Mittelwert. MoBa: Norwegian Mother and Child Cohort Study. NHANES: National Health and Nutrition Examination Survey. PRAMS: Pregnancy Risk Assessment Monitoring System. OR: Odds Ratio. PAD-Study: Pregnancy, Anxiety and Depression Study. RR: relatives Risiko. SCOPE: Screening for Pregnancy Endpoints. SD: Standardabweichung. Sign.: signifikant. SSW: Schwangerschaftswoche. WISH: Woman and Infants Starting Healthy.

en mit einem Alter unter 25 Jahren, die trotz Schwangerschaft weiterrauchten [32,61,62], während Kharkova et al. [57] zu gegenteiligen Befunden kamen. Die Eingebundenheit in soziale Beziehungen und die Verfügbarkeit an emotionalem Beistand, informeller und auch praktischer Hilfe stellen wichtige Ressourcen für die erfolgreiche Bewältigung von stressreichen Ereignissen dar und wirken sich entsprechend auch förderlich auf die körperliche und psychische Gesundheit aus [88]. Gleichzeitig wird der sozialen Unterstützung auch eine wichtige Funktion in der Tab-

bakentwöhnung von Schwangeren beigemessen [89]. Schwangere Frauen mit fortgesetztem Nikotinkonsum erleben häufiger Konflikte mit dem Partner [54,59] und fühlen sich seltener durch ihren Partner oder nahe Angehörige bzw. Freunde unterstützt oder sind unzufriedener mit der wahrgenommenen Unterstützung durch ihren Partner [37]. Der Nikotinverzicht wird in diesem Zusammenhang auch in besonderem Maße erschwert, wenn der Partner selbst raucht [35].

Abgesehen von sozialen Merkmalen ergeben sich bei schwangeren Raucherinnen wiederkehrend Hinweise für das Vorliegen psychischer Beeinträchtigungen bzw. Belastungen, zumeist in Form von erhöhten Depressions- und Angstwerten [51,53,54,59,68]. Frauen, die in der Schwangerschaft weiterrauen, sind fast doppelt so häufig depressiv im Vergleich zu Frauen, die mit dem Rauchen aufhören [68]. Auch kritische Lebensereignisse und hoher wahrgenommener Stress können den Nikotinverzicht in der Schwangerschaft erschweren [54]. Schwangere Frauen mit einem Migrationshintergrund scheinen Nikotin seltener als Frauen ohne Migrationshintergrund zu konsumieren [32]; ein wesentlicher begünstigender Faktor für einen pränatalen Nikotinkonsum stellen jedoch psychische Probleme aufseiten der Schwangeren mit Migrationshintergrund dar [61].

Einen nicht zu vernachlässigenden gesundheitsrelevanten Einflussfaktor stellt das präkonzeptionelle Rauchverhalten werden der Mütter wie etwa die Menge und die Häufigkeit des Nikotinkonsums dar [35]. Frauen, die bereits vor der Schwangerschaft mehr als 10 Zigaretten rauchten, fällt es deutlich schwerer, ihren Konsum in der Schwangerschaft zu beenden bzw. zu reduzieren [65]. Häufig geht ein Nikotinkonsum dabei auch mit der zeitgleichen Einnahme von Alkohol und illegalen Drogen einher, entweder vor oder in der Schwangerschaft [51,58,62,65]. Des Weiteren zeichnen sich schwangere Raucherinnen oftmals dadurch aus, dass die Schwangerschaft ungeplant war [51,62,67] und die betroffenen Frauen im Vergleich zu Nichtraucherinnen entweder seltener oder erst mit fortgeschrittener Schwangerschaft die ärztlichen Routineuntersuchungen im Rahmen der Schwangerenvorsorge wahrnehmen [32,35,61]. Im Vergleich zu Erst- oder Zweitgebärenden stellen Frauen, die bereits zuvor mehrere Kinder geboren haben, eine besondere Risikogruppe für einen fortgesetzten Nikotinkonsum in der Schwangerschaft dar [32,35,56–57,65,67].

Im Unterschied zum mütterlichen Nikotinkonsum ist die Einnahme von geringen bis moderaten Mengen *Alkohol* während der Schwangerschaft ein Risikofaktor, der eher Frauen mit einem höheren sozioökonomischen Status und vordergründig ältere Frauen (Alter > 30 Jahre) betrifft [34,61,63,66]. Skagerström et al. [36], welche die Befunde von 14 Studien aus den Jahren 2002 bis 2009 zusammenfassen, kommen jedoch zu keinem eindeutigen Ergebnis zum Einfluss des sozialen Status der Schwangeren auf den pränatalen Alkoholkonsum. Melchior et al. [61] konnten in Abhängigkeit des Migrationsstatus der Schwangeren unterschiedliche Prädiktoren für einen gelegentlich exzessiven Alkoholkonsum in der Schwangerschaft aufzeigen. So war das Binge-Drinking-Verhalten nur bei Schwangeren ohne Migrationshintergrund mit einem höheren Alter und hohem Schulabschluss assoziiert.

Als ein wichtiger psychischer Faktor, der einen fortgesetzten Alkoholkonsum in der Schwangerschaft begünstigen kann, scheinen ein stattgefundener Missbrauch oder Gewalterfahrungen durch den Partner oder andere Personen zu gelten [36]. Allerdings konnten Skagerström et al. [36] nur 3 Studien hierzu identifizieren (vgl. **Tab. 1**). Powers et al. [65] berichteten, dass Gewalterfahrungen der werdenden Mutter durch den Partner eher mit einem fortgesetzten Alkohol- und Nikotinkonsum assoziiert waren. Beijers et al. [52] stellten fest, dass auch kritische Lebensereignisse wie straffatbezogene Ereignisse (z.B. in Unfall involviert), Konflikte mit dem Partner oder schwangerschaftsspezifische Ereignisse (z.B. Blutungen, Pränataldiagnostik zur Abklärung von Fehlbildungen/Behinderungen) das Risiko für einen fortgesetzten Alkoholkonsum in der Schwangerschaft erheblich

erhöhen können (vgl. **Tab. 2**), wobei die Autoren keine Zusammenhänge zwischen pränatalem Alkoholkonsum und erhöhten Depressions- oder Angstwerten ermitteln konnten. Möglicherweise ist der Konsum von Alkohol, aber auch Nikotin, als eine grundsätzliche, wenn auch maladaptive, Strategie der betroffenen Frauen im Umgang mit negativen Gefühlen und in der Bewältigung traumatischer Ereignisse zu verstehen [36,52], insbesondere dann, wenn die betroffenen Frauen keine Unterstützung in der Verarbeitung emotionaler Belastungen durch ihren Partner erfahren [65].

Inwieweit es schwangeren Frauen gelingt, ihren Alkoholkonsum einzustellen, hängt im Wesentlichen von der Menge und Häufigkeit ihres Alkoholkonsums vor der Schwangerschaft ab [36]. Frauen, die vor dem Einsetzen der Schwangerschaft mehr als 2 alkoholische Getränke pro Woche bzw. mehr als 5 alkoholische Getränke pro Gelegenheit (Binge-Drinking-Verhalten) konsumierten, fällt es deutlich schwerer, ganz auf Alkohol in der Schwangerschaft zu verzichten [55,60,65]. Gleiches gilt für schwangere Frauen, die vor oder in der Schwangerschaft zusätzlich rauchten [55,63–66]. Des Weiteren konnte in 2 der einbezogenen Studien ein Zusammenhang zwischen dem fortgesetzten mütterlichen Alkoholkonsum und einer ungeplanten Schwangerschaft aufgezeigt werden [55,60]; unklar ist demgegenüber die Frage, ob eher Erstgebärende oder Mehrgebärende Schwierigkeiten haben, ihren Alkoholkonsum einzustellen [36]. McDonald et al. [60] berichteten bspw., dass eher Frauen, die noch keine Kinder geboren haben, zum Binge-Drinking-Verhalten in der Frühschwangerschaft, d.h. vor Bekanntwerden der Schwangerschaft, neigen. Ein fortgesetzter leichter bis moderater Alkoholkonsum in der Schwangerschaft wird demgegenüber zumeist bei Frauen festgestellt, die bereits mehrere Kinder geboren haben [36,61,65].

## Ernährungsverhalten und Gewichtszunahme

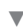

Das Ernährungsverhalten und eine adäquate Gewichtszunahme der Schwangeren spielen eine wichtige Rolle für die Gesundheit und das psychische Befinden der werdenden Mutter selbst, aber auch für die neuronale Entwicklung und die spätere Gesundheit eines Kindes [90–91]. Das rasche Wachstum und die neuronale Entwicklung des ungeborenen Kindes stellen besondere Anforderungen an die Nährstoffversorgung der Schwangeren [4,92]. Während sich der Energiebedarf der Schwangeren jedoch im Verlauf der Schwangerschaft nur geringfügig verändert, besteht ein besonderer Bedarf an Mikronährstoffen (z.B. Vitaminen und Mineralstoffen) [91]. Eine Mangel- bzw. Fehlernährung der Schwangeren kann entweder aus einer kalorischen Unter- bzw. Überversorgung mit einer entsprechenden Gewichtszunahme oder einer inadäquaten Qualität der eingenommenen Nahrung einschließlich einer geringen Zufuhr an Mikronährstoffen resultieren [4]. Neben dem Ernährungsverhalten kann sich auch das präkonzeptionelle Ausgangsgewicht auf die Gewichtszunahme in der Schwangerschaft auswirken und den Schwangerschafts- und Geburtsverlauf nachhaltig beeinflussen. Entsprechend wird empfohlen, dass normalgewichtige Frauen (BMI 18,5–24,9 kg/m<sup>2</sup>) max. 16 kg im Verlauf der Schwangerschaft an Gewicht zunehmen sollten, während die Obergrenze bei untergewichtigen Frauen (BMI < 18,5 kg/m<sup>2</sup>) bei 18 kg und bei übergewichtigen bzw. adipösen Frauen (BMI ≥ 30 kg/m<sup>2</sup>) bei 11,5 kg bzw. bei max. 9 kg liegen sollte [93].

### Auswirkungen einer Fehlernährung und exzessiven Gewichtszunahme bis hin zur Adipositas in der Schwangerschaft

Die kurz- und langfristigen Auswirkungen des mütterlichen Ernährungsverhaltens in der Schwangerschaft werden gegenwärtig intensiv erforscht. Der Verzehr hoher Mengen von Fleisch, gezuckerter Getränke, gesüßter oder gesalzener Speisen kann möglicherweise das Risiko für hypertensive Schwangerschaftserkrankungen (z. B. Präeklampsie), eine Frühgeburt und eine zu geringe Größe des Kindes gemessen am Gestationsalter (SGA) begünstigen [4, 94]. Erste Hinweise für die langfristige Bedeutung der Ernährungsweise der Schwangeren für die weitere Entwicklung des Kindes liefern die Ergebnisse von 2 prospektiven populationsbasierten Kohortenstudien, wonach ein unausgewogenes und ungesundes Ernährungsmuster der Schwangeren (z. B. hohe Mengen an Fleisch, süßen Getränken und salzigen Snacks, geringe Zufuhr an Gemüse und Obst) mit späteren externalisierenden, jedoch nicht mit internalisierenden, Verhaltensstörungen des Kindes assoziiert sind [95, 96].

Eine unzureichende Zufuhr an *Mikronährstoffen* (z. B. Eisen- oder Kalziummangel) ist mit vielfältigen medizinischen Komplikationen assoziiert [97]. Demgegenüber kann die Zufuhr an Mikronährstoffen (z. B. durch Einnahme von Vitamin-, Folsäure- oder Eisenpräparaten) in Ergänzung zur Nahrung das Risiko für Neuralrohrdefekte, für Frühgeburten, ein niedriges Geburtsgewicht und für ein SGA-Kind reduzieren [98]. Dabei zeigt sich einer aktuellen Studie zufolge eine deutliche Überlegenheit der Einnahme multipler Mikronährstoffe im Vergleich zu einzelnen Eisenpräparaten mit oder ohne Folsäure [99]. Als Spätfolgen eines Mangels an Mikronährstoffen (vor allem Eisen- und Jodmangel) in der Schwangerschaft für das betroffene Kind werden spätere Beeinträchtigungen in der motorischen, kognitiven und sozial-emotionalen Entwicklung des Kindes diskutiert [92, 100].

Als Folgen einer *exzessiven Gewichtszunahme* in der Schwangerschaft der Mutter gelten Geburtskomplikationen (z. B. Kaiserschnittgeburt) und Schwierigkeiten der Mutter bei der Gewichtsabnahme nach der Geburt [93]. Ebenso kann sich eine exzessive Gewichtszunahme auf das fetale Wachstum auswirken; die Folgen sind ein zu starkes fetales Wachstum (LGA) oder ein zu hohes Geburtsgewicht [101]. Im weiteren Entwicklungsverlauf kann eine übermäßige Gewichtszunahme das Risiko für eine spätere Adipositas aufseiten des Kindes erhöhen [102]. Demgegenüber weisen Frauen, die vor der Schwangerschaft untergewichtig waren oder in der Schwangerschaft zu wenig Gewicht zunehmen, ein höheres Risiko auf, Kinder zu früh, mit einem zu geringen Geburtsgewicht oder mit einer zu geringen Größe zu gebären [101, 103–105]. Als langfristige Konsequenzen einer intrauterinen Mangelversorgung werden u. a. ein postnatales Aufholwachstum und ein damit einhergehendes erhöhtes Risiko für Adipositas, aber auch Nieren- und kardiovaskuläre Erkrankungen im Erwachsenenalter (z. B. arterielle Hypertonie) diskutiert [4, 106].

Eine bereits vor der Schwangerschaft bestehende *Adipositas* der werdenden Mutter stellt für sich genommen einen vielfach untersuchten Risikofaktor für perinatale Komplikationen dar. Marchi et al. [5] sichten 22 Übersichtsarbeiten und Metaanalysen hierzu aus den Jahren 2007–2014. Die Komplikationen infolge einer mütterlichen Adipositas können ein erhöhtes Risiko für spontane Fehlgeburten und Fehlbildungen in der Frühschwangerschaft (z. B. Neuralrohrdefekte), Schwangerschaftsdiabetes, schwangerschaftsbedingten Bluthochdruck, Präeklampsie, Kaiserschnittgeburten, nachgeburtliche starke Blutungen, ein höheres Risiko für angeborene Anomalien, Frühgeburtlichkeit und ein

Risiko für LGA-Kinder umfassen [5]. Langfristig gesehen weisen Kinder von Müttern, die bereits in der Schwangerschaft übergewichtig bzw. adipös waren, selbst ein erhöhtes Risiko auf, im späteren Entwicklungsverlauf ein Übergewicht, Adipositas [103] oder erhöhten Blutdruck sowie Diabetes mellitus Typ II zu entwickeln [107]. Darüber hinaus ergeben sich erste Hinweise für spätere kognitive Beeinträchtigungen sowie externalisierende und internalisierende Verhaltensstörungen infolge einer mütterlichen Adipositas in der Schwangerschaft [108–109].

### Häufigkeit der Fehlernährung und exzessiven Gewichtszunahme/Adipositas in der Schwangerschaft

Eine inadäquate Zufuhr an Makro- und Mikronährstoffen stellt nicht nur in Ländern mit einem geringen Einkommen ein zentrales Gesundheitsproblem dar [109]. Aktuelle Metaanalysen zufolge nehmen schwangere Frauen in den USA, Kanada, im Vereinigten Königreich, in Japan, Australien und Neuseeland bspw. zu viel Fette bzw. gesättigte Fettsäuren auf [110] und Folsäure-, Eisen-, Jod- und Vitamin-D-Präparate in deutlich geringeren Mengen ein als national empfohlen [111]. Des Weiteren ist weltweit eine deutliche Zunahme an übergewichtigen und adipösen Frauen im gebärfähigen Alter zu vernehmen [109]. Auch die Ergebnisse einer Perinatalerhebung in Deutschland zeigen, dass der Anteil an Schwangeren mit einem BMI von 30–40 kg/m<sup>2</sup> von 8,2% im Jahr 1995 auf 13,0% im Jahr 2011 anstieg, der Anteil an Frauen mit einem BMI  $\geq 40$  kg/m<sup>2</sup> verdreifachte sich sogar auf 1,8%, wohingegen der Anteil von untergewichtigen Schwangeren (BMI  $< 18,5$  kg/m<sup>2</sup>) mit rund 4% nahezu konstant blieb [33].

### Begünstigende Faktoren einer Fehlernährung und einer exzessiven Gewichtszunahme/Adipositas

Über die Literaturrecherche konnten 6 systematische Reviews (eines davon mit Metaanalyse) hierzu ermittelt werden, die mögliche Prädiktoren einer Fehlernährung oder exzessiven Gewichtszunahme bis hin zur Adipositas zusammenfassen. Eine weiterführende Suche ergab 19 weitere empirische Einzelstudien (n = 5 Studien zur Ernährungsweise; n = 4 Zufuhr von Mikronährstoffen am Beispiel der Folsäureeinnahme; n = 10 Studien zur Gewichtszunahme) aus den Jahren 2005–2016 (vgl. **Tab. 2**). Im Folgenden werden die Ergebnisse zunächst für das Ernährungsverhalten vorgestellt, im zweiten Schritt dann die Befunde zu Einflussfaktoren einer exzessiven Gewichtszunahme und Adipositas zusammenfassend dargestellt.

Grundsätzlich werden das Ernährungsverhalten und die -qualität sowohl durch soziodemografische, sozioökonomische, soziokulturelle als auch psychosoziale und verhaltensbezogene Faktoren maßgeblich beeinflusst [112]. Jene Faktoren sind auch für das Ernährungsverhalten in der Schwangerschaft bedeutsam. Studien zeigen, dass eine Fehlernährung der Schwangeren entweder durch eine häufige Zufuhr an fett- oder zuckerhaltigen Lebensmitteln, unzureichende Zufuhr an gesunden Lebensmitteln (z. B. Obst, Gemüse, Reis, Fisch) oder mangelnde bzw. fehlende Zufuhr an wichtigen Mikronährstoffen (z. B. Folsäure) zumeist mit einem jungen Alter, einem Migrationsstatus, einem geringen Bildungsniveau sowie mit einer fehlenden Erwerbstätigkeit assoziiert ist [77–78, 81–82, 84, 86–87]. Auch alleinstehende oder unverheiratete Frauen mit fester Partnerschaft neigen häufiger dazu, sich nicht gesundheitsbewusst in der Schwangerschaft zu ernähren [77, 81, 86]. Möglicherweise begünstigt auch eine fehlende Eingebundenheit in soziale Beziehungen und eine mangelnde soziale Unterstützung eine ungesunde Ernährungsweise [37, 77]; auf-

grund der geringen Anzahl an Studien lassen sich hierzu bislang jedoch keine eindeutigen Schlussfolgerungen ziehen.

Zunehmend werden auch die Zusammenhänge zwischen der Ernährungsqualität und einer hohen Stressbelastung bzw. psychischer Beeinträchtigungen untersucht. So finden sich erste Hinweise, dass schwangere Frauen, die entweder erhöhte Depressionswerte zeigen oder häufig Stress erleben, sich eher ungesund und unausgewogen ernähren [38,76,87]. Beispielsweise berichten Wall et al. [87], dass schwangere Frauen mit depressiven Symptomen zu einer überwiegender Ernährung durch Junk-Food neigen. Auch ängstliche schwangere Frauen scheinen dazu zu tendieren, sich weniger gesund (z.B. häufiger Verzehr zuckerhaltiger Lebensmittel) zu ernähren [77,81]. Baskin et al. [38] interpretieren die Zusammenhänge zwischen einer geringen Ernährungsqualität und psychischen Beeinträchtigungen analog zum Nikotin- und Alkoholkonsum im Sinne eines Coping-Mechanismus; andererseits mutmaßen die Autoren, dass auch Einschränkungen im Antrieb und in der Motivation, über den Verlauf der gesamten Schwangerschaft auf die eigene Ernährung zu achten, eine wesentliche Rolle spielen können.

Zu wichtigen gesundheitsrelevanten Faktoren und Verhaltensweisen, die im Zusammenhang mit einer Fehlernährung stehen, zählen eine verminderte körperliche Aktivität [77], ein präkonzeptionelles Übergewicht bzw. Adipositas [81,84,85] und ein fortgesetzter Nikotin- oder Alkoholkonsum in der Schwangerschaft [51,67,77,79,81,86,87]. So ernähren sich schwangere Raucherinnen im Vergleich zu schwangeren Nichtraucherinnen bspw. häufig von fetthaltigen Lebensmitteln (z.B. Junk-Food, Chips) [81,87] und nehmen deutlich seltener Folsäure in Ergänzung zur Nahrung ein [51,67,79,86]. Häufiger scheint eine mangelnde Zufuhr an Mikronährstoffen bei Frauen, die bereits mehrere Kinder geboren haben, vorzukommen [78,79,82,86], wohingegen sich Hinweise für eine ungesunde und unausgewogene Ernährung sowohl bei Erst- als auch bei Mehrgebärenden finden lassen [77,81,84,87].

Mögliche Einflussfaktoren einer *übermäßigen Gewichtszunahme* sind vielfach untersucht worden. Aktuelle Übersichtsarbeiten widmen sich dabei ausschließlich den psychosozialen Prädiktoren einer exzessiven Gewichtszunahme (vgl. **Tab. 1**). In Ergänzung dazu wurden 10 empirische Studien, welche die Bedeutung soziodemografischer, lebensstil- bzw. gesundheitsrelevanter Faktoren untersuchen, aus den Jahren 2005–2016 in diesen Übersichtsbeitrag einbezogen (vgl. **Tab. 2**).

Soziodemografische Risikofaktoren (z.B. Alter der werdenden Mutter) werden im Zusammenhang mit einer übermäßigen Gewichtszunahme häufig diskutiert; aktuelle Studien zeigen hierzu kein konsistentes Bild auf (vgl. **Tab. 2**). Eine wesentlich stärkere Bedeutung wird den modifizierbaren psychosozialen und gesundheitsrelevanten Faktoren beigemessen [39,40]. Beispielsweise bestehen Zusammenhänge zwischen einer exzessiven Gewichtszunahme in der Schwangerschaft und einer Unzufriedenheit mit dem präkonzeptionellen Körperbild (z.B. Präferenz für Schlankheit) oder einer inadäquaten Wahrnehmung des eigenen Körpergewichts. Ebenso ergeben sich Hinweise dafür, dass Frauen mit einer übermäßigen Gewichtszunahme häufig auch depressive Symptome aufweisen, die möglicherweise der Beziehung zwischen Unzufriedenheit mit dem eigenen Körperbild und exzessiver Gewichtszunahme in der Schwangerschaft zugrunde liegen [39]. Auch übergewichtige und adipöse Frauen haben im Vergleich zu normalgewichtigen Frauen häufiger depressive Symptome in der Schwangerschaft und auch nach der Geburt [41]. Ebenso scheinen adipöse Schwangere vermehrte

Angstsymptome aufzuweisen, jedoch ist die Befundlage hierzu weniger aussagekräftig aufgrund der geringen Anzahl und der mangelnden methodischen Qualität der Studien [42].

Der präkonzeptionelle Body-Mass-Index stellt den wichtigsten gesundheitsrelevanten Risikofaktor für eine übermäßige Gewichtszunahme in der Schwangerschaft dar, der sich in der routinemäßigen Vorsorgeuntersuchung gut überprüfen lässt. Vor allem übergewichtige und adipöse Frauen weisen ein erhöhtes Risiko auf, zu viel an Gewicht im Verlauf der Schwangerschaft zuzunehmen [69–71,73–74,83]. Aber auch ein eigenes hohes Geburtsgewicht der werdenden Mutter [83] sowie der Body-Mass-Index des werdenden Vaters sind mit einer exzessiven Gewichtszunahme assoziiert [72]. Darüber hinaus kann ein fortgesetzter Nikotinkonsum [72,74], ebenso ein Tabakverzicht und ein Bewegungsmangel [69,80,83] eine übermäßige Gewichtszunahme begünstigen [83]. Eine regelmäßige körperliche Aktivität in der Schwangerschaft kann demgegenüber einer übermäßigen Gewichtszunahme präventiv entgegenwirken. Frauen, die mindestens 2 Stunden über die Woche verteilt körperlich aktiv sind, überschreiten die empfohlenen Richtwerte zur Gewichtszunahme seltener als körperlich inaktive Frauen [73–74]. Des Weiteren kann sich die Anzahl vorausgegangener Geburten auf die Gewichtszunahme in der Schwangerschaft auswirken. Frauen, die zuvor noch keine Kinder geboren haben, weisen im Vergleich zu Mehrgebärenden ein höheres Risiko für eine exzessive Gewichtszunahme auf [70,72–73,75,80]. Mehrgebärende sind im Gegensatz dazu häufiger übergewichtig bzw. adipös und nehmen seltener übermäßig an Gewicht zu [72,75].

## Psychisches Befinden

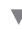

Seit den 3 letzten Jahrzehnten wuchs das Interesse daran, die Auswirkungen des psychischen Befindens der Schwangeren auf den Schwangerschafts- und Geburtsverlauf sowie auf die fetale und kindliche Entwicklung zu untersuchen [6]. Die Literaturrecherche hat dabei ergeben, dass sich der überwiegende Teil an systematischen Reviews und Metaanalysen dem Zusammenhang zwischen emotionalen Beeinträchtigungen in Form von Stress, Depression oder Ängsten der werdenden Mutter und Geburtsparametern des Kindes widmet. Daher beschränkt sich dieser Beitrag auf diese Risiken. Grundsätzlich wird angenommen, dass chronische übermäßige emotionale Belastungen des Schwangeren zu Dysregulationen in der mütterlichen und fetalen Hypothalamus-Hypophysen-Nebennierenrinden-Achsen-Aktivität führen können [113]. Die Plazentasperre schützt den Fetus normalerweise vor zu hohen Kortisolkonzentrationen über ein bestimmtes Enzym, die 11 $\beta$ -Hydroxysteroid-Dehydrogenase (11 $\beta$ -HSD) Typ 2, welches Kortisol in biologisch inaktives Kortison umwandelt [15]. Möglicherweise führen jedoch chronisch erhöhte Stresshormonkonzentrationen über eine Downregulation des 11 $\beta$ -HSD2-Enzyms zu einer vermehrten Durchlässigkeit, sodass mehr Kortisol in den fetalen Blutkreislauf gelangen kann [113]. Infolge übermäßig hoher pränataler Stresshormonexpositionen kann ein Kind in seiner neuronalen, immunologischen und verhaltensbezogenen Entwicklung beeinträchtigt werden, wodurch langfristig eine erhöhte Vulnerabilität für psychische und körperliche Erkrankungen begünstigt wird [114].

### Auswirkungen psychischer Beeinträchtigungen in Form von Stress, erhöhten Depressions- und Angstwerten in der Schwangerschaft

Schwangere Frauen mit Depression und Ängsten leiden häufiger unter Schwangerschaftssymptomen wie Übelkeit und Erbrechen [115]. Während Grigoriadis et al. [116] keine Zusammenhänge zwischen Depression und Präeklampsie ermitteln konnten, zeigt eine aktuellere Studie [117], dass depressive Symptome der Schwangeren mit einem höheren Risiko für Präeklampsie einhergehen können. Darüber hinaus weisen verschiedene Studien darauf hin, dass depressive und ängstliche Frauen in der Schwangerschaft häufiger Ärzte konsultieren und häufiger Schmerzbehandlungen unter der Geburt wahrnehmen [115]. Weitere perinatale Komplikationen infolge erhöhter Stress-, Depressivitäts- und Angstwerte der Mutter bis hin zu klinisch relevanten Ausprägungen können vor allem eine Frühgeburt und ein geringes Geburtsgewicht des Neugeborenen umfassen [118–120]. Ebenso ergeben sich Hinweise, dass eine Depression der Schwangeren intrauterine Wachstumsverzögerungen begünstigen kann [121–122]. Bleibt eine psychische Beeinträchtigung der werdenden Mutter unbehandelt, besteht die Gefahr, dass sich psychische Auffälligkeiten auch nach der Geburt des Kindes fortsetzen [123–124], wodurch das Versorgungs- wie auch Interaktionsverhalten der Mutter erheblich einschränkt sein kann [125–127]. Kinder von pränatal stressbelasteten und depressiven Müttern zeigen im Kleinkindalter häufiger bereits Schwierigkeiten in der Anpassung an neue und stressreiche Ereignisse, eine erhöhte Erregbarkeit sowie Beeinträchtigungen in der Aufmerksamkeits-, Verhaltens- und Emotionsregulation [128–129]. Auch Verzögerungen in der motorischen und kognitiven Entwicklung aufseiten des Kindes infolge von Beeinträchtigungen im psychischen Wohlbefinden der Mutter sind belegt [130–132]. Langfristig gesehen können Depression und Ängste der Schwangeren das Risiko für emotionale und Verhaltensstörungen des Kindes erhöhen [129]. Vor allem stellt eine pränatale depressive Störung der Mutter einen bedeutsamen Risikofaktor für späteres aggressives Verhalten des Kindes dar [133].

### Häufigkeit von Stress, Depression und Ängsten in der Schwangerschaft

Die Zeit der Schwangerschaft und die Geburt sind für die werdende Mutter aufgrund der vielseitigen physiologischen, psychischen und sozialen Veränderungen eine Phase, in der Frauen vulnerabler für Stress und psychische Beeinträchtigungen sein können [15, 123]. Eine Befragung von 1522 Schwangeren ergab bspw., dass bis zu 78% der Frauen leichte bis moderate und 6% eine hohe Stressbelastung in der Schwangerschaft erleben [134]. Verunsicherungen, Ängste und Sorgen über die Gesundheit des ungeborenen Kindes oder die bevorstehende Geburt gehören zum normalen Anpassungsprozess einer Frau an die Schwangerschaft und die Mutterrolle; jenen Symptomen kommt jedoch dann eine klinische Relevanz zu, wenn sie übermäßig stark über einen längeren Zeitraum fortbestehen und zu erheblichen funktionellen Beeinträchtigungen der Schwangeren führen [123]. Depressionen und Ängste zählen zu den am häufigsten vorkommenden psychischen Störungen in der Schwangerschaft. Bis zu 18,4% der Frauen entwickeln im Verlauf der Schwangerschaft eine depressive Symptomatik, unter einer behandlungsbedürftigen Depression (*major depression*) leiden ca. 12,7% der Schwangeren [135]. Die Angaben zur Häufigkeit von Angststörungen in der Schwangerschaft variieren zwischen 4,4 und 39% [136]. Schwangerschaftsspezifische Ängste sind sehr weit verbreitet:

ca. 34% der Schwangeren sind besorgt über die bevorstehende Geburt, 32,4% der Frauen fürchten sich vor einem Dammriss bzw. -schnitt und 26,8% vor Wehenschmerzen [137].

### Begünstigende Faktoren für Depression und Ängste in der Schwangerschaft

Über die Literaturrecherche konnten 4 systematische Reviews ermittelt werden, die mögliche Risikofaktoren aus unterschiedlichen Bereichen (z. B. soziodemografische Merkmale, psychische/psychiatrische oder geburtsmedizinische/schwangerschaftsspezifische Faktoren) für eine pränatale depressive und Angstsymptomatik bzw. behandlungsbedürftige psychische Störungen der werdenden Mutter bestimmt haben (vgl. **Tab. 1**). Darüber hinaus konnten 4 weitere systematische Reviews und/oder Metaanalysen aus den Jahren 2013–2016 identifiziert werden, die einzelne Risikofaktoren (z. B. häusliche Gewalt, ungewollte Schwangerschaft) im Zusammenhang mit einer mütterlichen Depression und Angst in der Schwangerschaft untersuchen. Auf eine weiterführende Recherche zu aktuellen empirischen Einzelarbeiten wurde daher verzichtet.

Häufig untersuchte soziodemografische und ökonomische Faktoren, die zur Entstehung von Depression und Angststörungen in der Schwangerschaft beitragen können, sind ein junges Alter der Schwangeren, ein lediger Familienstatus, ein geringes Einkommen und ein niedriger Bildungsstand [45, 46, 48–49]. Eindeutige Ergebnisse zeigen sich hierbei am ehesten für pränatale Angststörungen [49], während Zusammenhänge zwischen depressiver Symptomatik und soziodemografischen sowie ökonomischen Faktoren möglicherweise in Abhängigkeit des Erhebungslands bestehen [45–46, 48]. Keine eindeutigen Zusammenhänge konnten bislang zum Migrationshintergrund bzw. der Ethnizität der Schwangeren ermittelt werden [46, 48]. Als konsistente soziale Risikofaktoren für eine Depressions- oder Angstsymptomatik in der Schwangerschaft erwiesen sich eine fehlende oder ungenügende soziale Unterstützung durch den Partner und Partnerschaftskonflikte [46, 48–50]. Dem emotionalen Beistand und der praktischen Hilfe durch den Partner oder nahestehende Personen kommt eine wichtige Funktion beim Hineinfinden in die Mutterrolle und bei der Bewältigung von Ereignissen oder Schwierigkeiten zu, die im Zusammenhang mit der Schwangerschaft und der Geburt eines Kindes stehen [45]. Häufige Konflikte mit dem Partner oder Unzufriedenheit mit dem Partner können ihrerseits als belastend durch die Schwangere erlebt werden und die Anpassungsleistung an die Elternschaft erheblich beeinträchtigen. Ein wertschätzender, verständnisvoller Beistand durch den Partner sowie emotionale Verbundenheit stellen demgegenüber eine wichtige Ressource im Übergang zur Elternschaft dar, die das Risiko für eine perinatale Depression oder Angst mindern können [50].

Eine wichtige Rolle in der Entstehung von Depression und Ängsten in der Schwangerschaft spielen psychiatrische Vorerkrankungen der Schwangeren, entweder in vorangegangenen Schwangerschaften oder zu einem anderen Zeitpunkt im Leben der Frau [45–46, 49]. Es finden sich jedoch ebenso Hinweise, dass ein Großteil der betroffenen Frauen nie zuvor psychisch erkrankt war [45]. Darüber hinaus treten Depression und Angststörungen häufig komorbid auf, wobei ausgeprägte Angstsymptome der Schwangeren die Entwicklung einer Depression begünstigen können [45]. Ebenso erhöhen kritische Lebensereignisse (z. B. Verlust einer nahestehenden Person) und hohe wahrgenommene Stressbelastungen der Schwangeren das Risiko für pränatale Depressionen und Ängste [45, 48]. Die betroffenen Frauen können

dadurch häufig Schuldgefühle erleben oder sich um die Gesundheit und Entwicklung ihres ungeborenen Kindes sorgen.

Eine besondere Risikogruppe für Depressionen oder Ängste in der Schwangerschaft stellen Frauen mit unterschiedlichen Missbrauchs- bzw. Misshandlungserfahrungen (z.B. Missbrauch in der Kindheit, Gewalterfahrungen durch den Partner) dar [44]. Ungefähr 1,8–31,7% der schwangeren Frauen sind Opfer von Gewalt, wobei die Dunkelziffer vermutlich weitaus höher ausfällt [138]. Frauen mit einer depressiven oder Angstsymptomatik haben ein 3- bis 5-fach erhöhtes Risiko, häusliche Gewalt durch ihren Partner zu erfahren [47]. Dabei ist davon auszugehen, dass gewaltbelastete Konflikte in der Partnerschaft häufig auch nach der Geburt bestehen bleiben und ihrerseits nachhaltig die weitere Entwicklung des Kindes prägen [139]. Frauen mit Gewalterfahrungen berichten zumeist eine negativere Einstellung zur Schwangerschaft und eine geringere Bindung zu ihrem ungeborenen Kind als Schwangere ohne Gewalterfahrungen [140]. Auch nach der Geburt haben Frauen mit vorausgegangenen Gewalterfahrungen in der Schwangerschaft möglicherweise Schwierigkeiten, eine Beziehung zu ihrem Kind aufzubauen, wodurch sich das Gefährdungspotenzial für Kindesvernachlässigung und -misshandlung durch die Mutter erhöhen kann [141], insbesondere dann, wenn weitere psychosoziale Risikofaktoren vorliegen [142].

In den vorangegangenen Abschnitten wurde dargelegt, dass Frauen, die in der Schwangerschaft weiter rauchen, sich ungesund bzw. unausgewogen ernähren oder übermäßig an Gewicht zunehmen, zumeist auch eine depressive und/oder Angstsymptomatik aufweisen [38, 39, 41]. Generell unklar ist dabei bislang jedoch, ob psychische Beeinträchtigungen und Stressbelastungen das Gesundheitsverhalten von Schwangeren beeinträchtigen oder gesundheitsschädigende Verhaltensweisen zu Depression oder Ängsten führen [45]. Da die präkonzeptionellen Ausprägungen depressiver und Angstsymptome zumeist nicht erfasst werden, sind die beschriebenen Befunde vorläufig eher im Sinne einer Komorbidität zu interpretieren [42].

Auch geburtsmedizinische und schwangerschaftsspezifische Faktoren können einen wesentlichen Beitrag zur Entstehung von Depressionen und Ängsten leisten. Aus Studien geht hervor, dass eine unbeabsichtigte Schwangerschaft eine Depression oder Ängste begünstigen kann (vgl. **Tab. 1**). Den Ergebnissen von Abajour et al. [43] zufolge entwickeln bis zu 21% der Frauen mit einer ungewollten bzw. ungeplanten Schwangerschaft bspw. zum Zeitpunkt der Schwangerschaft oder Geburt eine Depression. Ein plötzlicher, unerwarteter perinataler Verlust eines Kindes (z.B. infolge einer Fehl- oder Totgeburt) kann sowohl komplizierte Trauerreaktionen als auch die Entstehung psychischer Störungen auslösen [143]. Insbesondere erhöhte Angst- und Depressionswerte bis hin zu behandlungsbedürftigen Angst- und/oder depressiven Störungen in Folgeschwangerschaften können aus einem vorausgegangenen Schwangerschaftsverlust (z.B. Fehl- und Totgeburt), neonatalen Sterbefall sowie gegenwärtigen oder vorausgegangenen Schwangerschaftskomplikationen resultieren [45, 49]. Eine besondere Bedeutung kommt dabei möglicherweise einem Intervall unter 6 Monaten zwischen Schwangerschaftsverlust und erneuter Schwangerschaft zu [45].

## Schlussfolgerungen für die klinische Praxis

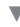

Die Schwangerschaft und Geburt eines Kindes stellen einen besonders günstigen Zeitpunkt für präventive Gesundheitsmaßnahmen (z.B. Gewichtsnormalisierung, Rauchentwöhnung, Stressreduktion, Ernährungsberatung) dar [1]. Schwangere setzen sich zumeist intensiv mit möglichen Risiken für ihr ungeborenes Kind auseinander [144] und sind entsprechend offener für Veränderungen, die der Gesundheit ihres noch ungeborenen Kindes dienen. Die Mehrheit der Schwangeren ist bereit, ihren Nikotin- und/oder Alkoholkonsum zu reduzieren oder gar darauf zu verzichten und sich gesundheitsbewusst zu ernähren [145]. Dennoch zeigt ein erheblicher Anteil an Schwangeren weiterhin gesundheitsschädigende Verhaltensweisen, wobei die Angaben zur Häufigkeit dieser Risiken, insbesondere der Nikotin- und Alkoholkonsum in der Schwangerschaft, in Abhängigkeit des Erhebungslands erheblich variieren (vgl. **Tab. 2**). Prinzipiell muss auch von einer Untererfassung des mütterlichen Nikotin- und Alkoholkonsum in der Schwangerschaft ausgegangen werden [146]. Die Gründe hierfür sind vielfältig [146, 147].

Auch das Erleben von emotionalen Belastungen ist bei Schwangeren weit verbreitet. Psychische Beeinträchtigungen bleiben zumeist unentdeckt, da sich die Symptome einer Depression oder von Ängsten (z.B. erhöhte Müdigkeit, Erschöpfung, Energiemangel, Sorgen) nicht eindeutig von schwangerschaftsspezifischen Beschwerden abgrenzen lassen. Kenntnisse über begünstigende Faktoren können daher erste Hinweise liefern und es Gynäkologen erleichtern, betroffene Frauen im Rahmen der routinemäßigen Schwangerenvorsorge frühzeitig zu identifizieren und entsprechende Maßnahmen einzuleiten. Ein wesentliches Ziel dieses Beitrags war es daher, einen Überblick zu möglichen Einflussfaktoren gesundheitsschädigender Verhaltensweisen und psychischer Beeinträchtigungen in der Schwangerschaft zu geben.

Die Literaturdurchsicht zeigte, dass ein fortgesetzter Substanzkonsum, eine Fehlernährung, eine zu starke Gewichtszunahme bis hin zur Adipositas oder Beeinträchtigungen im psychischen Befinden der Schwangeren gehäuft bei Vorliegen bestimmter psychosozialer, gesundheits- oder schwangerschaftsbezogener Besonderheiten der werdenden Mutter auftreten, die zumeist schon vor dem Einsetzen der Schwangerschaft bestehen. Deutlich wurde auch, dass komplexe Wechselbeziehungen zwischen einzelnen gesundheitsschädigenden Verhaltensweisen untereinander, aber auch mit psychischen Beeinträchtigungen bestehen, wobei die Wirkrichtung dieser Zusammenhänge bislang nicht eindeutig geklärt ist. In **Tab. 3** sind die Ergebnisse dieses Übersichtsbeitrags zusammenfassend dargestellt.

Viele dieser beschriebenen Einflussfaktoren auf das Gesundheitsverhalten oder auf das psychische Befinden der Schwangeren lassen sich sehr leicht im Rahmen der routinemäßigen Schwangerenvorsorge, wenn nicht sogar bereits vor dem Einsetzen der Schwangerschaft, identifizieren. Daher sollte der Fokus der Schwangerenbetreuung nicht ausschließlich auf der Einschätzung möglicher medizinischer Risiken für die Schwangere und ihr ungeborenes Kind liegen. Vielmehr sollten Gynäkologen sich in den Anamnesegesprächen ausreichend Zeit nehmen, um neben medizinischen Risiken ausführlich soziale und psychische Faktoren zu erfassen und auch das Konsum- und Ernährungsverhalten der Schwangeren offen anzusprechen. Ebenso sollten die Vorsorgeuntersuchungen auch dafür genutzt werden, mögliche psychosoziale und schwangerschaftsbezogene Belastungen der

**Tab. 3** Zusammenfassung der Ergebnisse zu Einflussfaktoren auf gesundheitsschädigende Verhaltensweisen und psychische Beeinträchtigungen in der Schwangerschaft.

| gesundheitsschädigende Verhaltensweisen                                                                                                                                                                                                                                                                                                                                                          |                                                                                                                                                                                                                                |                                                                                                                                                                            |                                                                                                                                                                                                        | psychische Beeinträchtigungen                                                                                                                                                                                                                                                                                                                                                 |                                                                                                                                                                                                                                                                                                                                       |
|--------------------------------------------------------------------------------------------------------------------------------------------------------------------------------------------------------------------------------------------------------------------------------------------------------------------------------------------------------------------------------------------------|--------------------------------------------------------------------------------------------------------------------------------------------------------------------------------------------------------------------------------|----------------------------------------------------------------------------------------------------------------------------------------------------------------------------|--------------------------------------------------------------------------------------------------------------------------------------------------------------------------------------------------------|-------------------------------------------------------------------------------------------------------------------------------------------------------------------------------------------------------------------------------------------------------------------------------------------------------------------------------------------------------------------------------|---------------------------------------------------------------------------------------------------------------------------------------------------------------------------------------------------------------------------------------------------------------------------------------------------------------------------------------|
| Nikotinkonsum                                                                                                                                                                                                                                                                                                                                                                                    | Alkoholkonsum                                                                                                                                                                                                                  | Fehlernährung                                                                                                                                                              | exzessive Gewichtszunahme/Adipositas                                                                                                                                                                   | Depression                                                                                                                                                                                                                                                                                                                                                                    | Ängste                                                                                                                                                                                                                                                                                                                                |
| <b>soziale Einflussfaktoren</b>                                                                                                                                                                                                                                                                                                                                                                  |                                                                                                                                                                                                                                |                                                                                                                                                                            |                                                                                                                                                                                                        |                                                                                                                                                                                                                                                                                                                                                                               |                                                                                                                                                                                                                                                                                                                                       |
| <ul style="list-style-type: none"> <li>▶ junges Alter der Mutter (unter 25 Jahre) [32, 61, 62]</li> <li>▶ niedriger SES/ Bildungsstand/ Einkommen [32, <b>35</b>, 51, 56–58, 61, 65, 68]</li> <li>▶ alleinstehend [57, 61, 67]</li> <li>▶ Merkmale der Partnerschaft (fehlende Unterstützung durch den Partner [37], Konflikte [54], Gewalt [65])</li> <li>▶ Partner, der raucht [35]</li> </ul> | <ul style="list-style-type: none"> <li>▶ höheres Alter der Mutter (über 30 Jahre) [<b>36</b>, 61, 63, 66]</li> <li>▶ hoher Bildungsstand [60, 61]</li> <li>▶ Merkmale der Partnerschaft (Gewalt durch Partner [65])</li> </ul> | <ul style="list-style-type: none"> <li>▶ junges Alter der Mutter (unter 25 Jahre) [78, 81, 84, 86, 87]</li> <li>▶ Migrationshintergrund [77, 81, 86]</li> </ul>            | <ul style="list-style-type: none"> <li>▶ uneinheitliche Angaben zum Alter [71, 74, 80, 83]</li> <li>▶ alleinstehend [74, 77, 81, 86]</li> <li>▶ mangelnde soziale Unterstützung [<b>39</b>]</li> </ul> | <ul style="list-style-type: none"> <li>▶ uneinheitliche Angaben zum Alter [45, 46, 48]</li> <li>▶ alleinstehend [46]</li> <li>▶ Merkmale der Partnerschaft (fehlende Unterstützung durch den Partner [45, 46, 50], Konflikte [50], Gewalt [45, 47, 48])</li> <li>▶ Partner, der raucht/ trinkt [50]</li> <li>▶ mangelnde soziale Unterstützung [<b>46, 48, 50</b>]</li> </ul> | <ul style="list-style-type: none"> <li>▶ junges Alter der Mutter (unter 25 Jahre) [49]</li> <li>▶ alleinstehend [46, 49]</li> <li>▶ Merkmale der Partnerschaft (fehlende Unterstützung durch den Partner [45, 46, 50], Konflikte [49, 50], Gewalt [45, 47])</li> <li>▶ mangelnde soziale Unterstützung [<b>46, 49, 50</b>]</li> </ul> |
| <b>psychische Faktoren</b>                                                                                                                                                                                                                                                                                                                                                                       |                                                                                                                                                                                                                                |                                                                                                                                                                            |                                                                                                                                                                                                        |                                                                                                                                                                                                                                                                                                                                                                               |                                                                                                                                                                                                                                                                                                                                       |
| <ul style="list-style-type: none"> <li>▶ pränatale Depression/Ängste [51, 53, 54, 59, 68]</li> <li>▶ Stress/kritische Lebensereignisse [54]</li> </ul>                                                                                                                                                                                                                                           | <ul style="list-style-type: none"> <li>▶ Misshandlungs-/ Missbrauchserfahrungen [<b>36</b>]</li> <li>▶ Stress/kritische Lebensereignisse [52]</li> </ul>                                                                       | <ul style="list-style-type: none"> <li>▶ pränatale Depression/Ängste [<b>38</b>, 81, 87]</li> <li>▶ Stress/kritische Lebensereignisse [<b>38</b>, 76]</li> </ul>           | <ul style="list-style-type: none"> <li>▶ pränatale Depression/Ängste [<b>41, 42</b>]</li> </ul>                                                                                                        | <ul style="list-style-type: none"> <li>▶ Stress/kritische Lebensereignisse [<b>45, 48</b>]</li> <li>▶ Misshandlungs-/ Missbrauchserfahrungen [<b>44, 47</b>]</li> <li>▶ vorausgegangene psychiatrische Erkrankung [<b>45, 46, 49</b>]</li> </ul>                                                                                                                              | <ul style="list-style-type: none"> <li>▶ Stress/kritische Lebensereignisse [<b>45</b>]</li> <li>▶ Misshandlungs-/ Missbrauchserfahrungen [<b>47</b>]</li> <li>▶ vorausgegangene psychiatrische Erkrankung [<b>45, 46, 49</b>]</li> </ul>                                                                                              |
| <b>gesundheitsrelevante Faktoren vor der Schwangerschaft</b>                                                                                                                                                                                                                                                                                                                                     |                                                                                                                                                                                                                                |                                                                                                                                                                            |                                                                                                                                                                                                        |                                                                                                                                                                                                                                                                                                                                                                               |                                                                                                                                                                                                                                                                                                                                       |
| <ul style="list-style-type: none"> <li>▶ Häufigkeit und Menge des Nikotinkonsums [<b>35</b>, 54, 65]</li> <li>▶ Drogenkonsum [62]</li> </ul>                                                                                                                                                                                                                                                     | <ul style="list-style-type: none"> <li>▶ Häufigkeit und Menge des Alkoholkonsums [<b>36</b>, 55, 60, 66]</li> <li>▶ Drogenkonsum [63]</li> </ul>                                                                               | <ul style="list-style-type: none"> <li>▶ Übergewicht/ Adipositas [81, 84, 85]</li> </ul>                                                                                   | <ul style="list-style-type: none"> <li>▶ Übergewicht/ Adipositas [69–71, 73, 74, 83]</li> </ul>                                                                                                        |                                                                                                                                                                                                                                                                                                                                                                               |                                                                                                                                                                                                                                                                                                                                       |
| <b>gesundheitsrelevante Faktoren in der Schwangerschaft</b>                                                                                                                                                                                                                                                                                                                                      |                                                                                                                                                                                                                                |                                                                                                                                                                            |                                                                                                                                                                                                        |                                                                                                                                                                                                                                                                                                                                                                               |                                                                                                                                                                                                                                                                                                                                       |
| <ul style="list-style-type: none"> <li>▶ Alkoholkonsum [51, 58, 62]</li> </ul>                                                                                                                                                                                                                                                                                                                   | <ul style="list-style-type: none"> <li>▶ Nikotinkonsum [36, 55, 63–65]</li> </ul>                                                                                                                                              | <ul style="list-style-type: none"> <li>▶ Nikotinkonsum [51, 67, 72, 74, 77, 79, 81, 86, 87]</li> <li>▶ Alkoholkonsum [86, 87]</li> </ul>                                   | <ul style="list-style-type: none"> <li>▶ Nikotinkonsum [72, 74]</li> <li>▶ Bewegungsmangel [69, 80, 83]</li> </ul>                                                                                     | <ul style="list-style-type: none"> <li>▶ Nikotinkonsum [<b>45</b>]</li> </ul>                                                                                                                                                                                                                                                                                                 |                                                                                                                                                                                                                                                                                                                                       |
| <b>schwangerschaftsspezifische Faktoren</b>                                                                                                                                                                                                                                                                                                                                                      |                                                                                                                                                                                                                                |                                                                                                                                                                            |                                                                                                                                                                                                        |                                                                                                                                                                                                                                                                                                                                                                               |                                                                                                                                                                                                                                                                                                                                       |
| <ul style="list-style-type: none"> <li>▶ hohe Anzahl vorausgegangener Geburten (mehr als 2) [32, <b>35</b>, 56, 57, 65, 67]</li> <li>▶ ungeplante Schwangerschaft [51, 62, 67]</li> <li>▶ inadäquate Schwangerenvorsorge [32, <b>35</b>, 61]</li> </ul>                                                                                                                                          | <ul style="list-style-type: none"> <li>▶ hohe Anzahl vorausgegangener Geburten (mehr als 2) [<b>36</b>, 61, 65]</li> <li>▶ ungeplante Schwangerschaft [55, 60]</li> <li>▶ Schwangerschaftskomplikationen [51]</li> </ul>       | <ul style="list-style-type: none"> <li>▶ hohe Anzahl vorausgegangener Geburten (mehr als 2) [78, 79, 81, 82, 84, 86]</li> <li>▶ ungeplante Schwangerschaft [86]</li> </ul> | <ul style="list-style-type: none"> <li>▶ keine vorausgegangene Geburt [70, 72, 73, 75, 80]</li> </ul>                                                                                                  | <ul style="list-style-type: none"> <li>▶ ungewollte/ungeplante Schwangerschaft [<b>43, 45, 46</b>]</li> <li>▶ vorausgegangene Schwangerschaftskomplikationen/ Schwangerschaftsverluste [<b>45</b>]</li> </ul>                                                                                                                                                                 | <ul style="list-style-type: none"> <li>▶ ungewollte/ungeplante Schwangerschaft [<b>45, 46, 49</b>]</li> <li>▶ vorausgegangene Schwangerschaftskomplikationen/ Schwangerschaftsverluste [<b>45, 49</b>]</li> </ul>                                                                                                                     |

Anmerkungen: Zahlen in eckigen Klammern entsprechen den einbezogenen Literaturquellen. Fett hervorgehoben sind systematische Reviews und Metaanalysen.

Frau im Verlauf der Schwangerschaft regelmäßig zu thematisieren [148].

Dieser Beitrag hat einen breiten Überblick zu möglichen Faktoren geliefert, die gesundheitsschädigende Verhaltensweisen und psychische Beeinträchtigungen in der Schwangerschaft begünstigen können. Da es sich bei diesem Beitrag nicht um einen systematischen Review handelt und der Fokus nicht auf einen einzelnen Risikofaktor in der Schwangerschaft gelegt wurde, war es nicht realisierbar, alle relevanten empirischen Studien zum Thema einzubeziehen. Möglicherweise sind dadurch auch weitere bedeutsame Prädiktoren wie etwa Merkmale des Partners (z. B. psychiatrische Erkrankung, Konsumverhalten oder Erwerbslosigkeit des Partners) oder gesundheitsbezogene Einstellungen, Überzeugungen und Intentionen zur Verhaltensänderung der Schwangeren unberücksichtigt geblieben.

## Interessenkonflikt

Nein.

## Literatur

- Meinlschmidt G, Tegethoff M. How life before birth affects human health and what can we do about it. *Eur Psychol* 2015; 20: 85–89
- Nigg JT. Where do epigenetics and developmental origins take the field of developmental psychopathology? *J Abnorm Child Psychol* 2016; 44: 405–419
- Spohr HL. Teratogene Effekte von Nikotin, Drogen und Alkohol. *Gynäkologe* 2005; 38: 25–32
- Cetin I, Laoreti A. The importance of maternal nutrition for health. *J Pediatr Neonatal I* 2014; 4: e04040220
- Marchi J, Berg M, Dencker A et al. Risks associated with obesity in pregnancy, for the mother and baby: a systematic review of reviews. *Obes Rev* 2015; 16: 621–638
- Dunkel-Schetter C, Tanner L. Anxiety, depression and stress in pregnancy: implications for mother, children, research and practice. *Curr Opin Psychiatry* 2012; 25: 141–148
- Huizink AC. Prenatal maternal substance use and offspring outcomes: overview of recent findings and possible interventions. *Eur Psychol* 2015; 20: 90–101
- Schneider H, Husslein PW, Schneider KT, Hrsg. Die Geburtshilfe. Berlin: Springer; 2011: 617–632
- Schmidt MH, Petermann F, Schipper M. Epigenetik – Revolution der Entwicklungspsychopathologie? *Kindh Entwickl* 2012; 21: 245–253
- Monk C, Spicer J, Champagne FA. Linking prenatal maternal adversity to developmental outcomes in infants: The role of epigenetic pathways. *Dev Psychopathol* 2012; 24: 1361–1376
- Lampert T, Richter M, Schneider S et al. Soziale Ungleichheit und Gesundheit. Stand und Perspektiven der sozialepidemiologischen Forschung in Deutschland. *Bundesgesundheitsbl* 2016; 59: 153–165
- De Graaf JP, Steegers EA, Bonsel GJ. Inequalities in perinatal and maternal health. *Curr Opin Obstet Gyn* 2013; 25: 98–108
- Goeckenjan M, Ramsauer B, Hänel M et al. Soziales Risiko – geburtshilfliches Risiko? *Gynäkologe* 2009; 42: 102–110
- Pillas D, Marmot M, Naicker K et al. Social inequalities in early childhood health and development: a European-wide systematic review. *Pediatr Res* 2014; 76: 418–424
- La Marca-Ghaemmaghami P, Ehler U. Stress during pregnancy. Experienced stress, stress hormones, and protective factors. *Eur Psychol* 2015; 20: 102–119
- Mund M, Louwen F, Klingelhoefer D et al. Smoking and pregnancy – a review on the first major environmental risk factor of the unborn. *Int J Environ Res Public Health* 2013; 10: 6485–6499
- Wessels C, Winterer G. Nikotin und Gehirnentwicklung. *Nervenarzt* 2008; 79: 7–16
- Hösl I, Zanetti-Daellenbach R, Holzgreve W et al. Rauchen während der Schwangerschaft. *Geburtsh Frauenheilk* 2008; 68: 141–146
- Marufu TC, Ahankari A, Coleman T et al. Maternal smoking and the risk of still birth: systematic review and meta-analysis. *BMC Public Health* 2015; 15: 239
- Pineles BL, Park E, Samet JM. Systematic review and meta-analysis of miscarriage and maternal exposure to tobacco smoke during pregnancy. *Am J Epidemiol* 2014; 179: 807–823
- Koch S, Vilser C, Groß W et al. Rauchen während der Schwangerschaft – Risiko für intrauterine Wachstumsrestriktion und bleibende Kleinwüchsigkeit. *Z Geburtshilfe Neonatol* 2012; 216: 77–81
- Hackshaw A, Rodeck C, Boniface S. Maternal smoking in pregnancy and birth defects: a systematic review based on 173687 malformed cases and 11.7 million controls. *Hum Reprod Update* 2011; 17: 589–604
- Zhou S, Rosenthal DG, Sherman S et al. Physical, behavioral, and cognitive effects of prenatal tobacco and postnatal secondhand smoke exposure. *Curr Probl Pediatr Adolesc Health Care* 2014; 44: 219–241
- Latimer K, Wilson P, Kemp J et al. Disruptive behaviour disorders: a systematic review of environmental antenatal and early years risk factors. *Child Care Health Dev* 2012; 38: 611–628
- Tiesler CM, Heinrich J. Prenatal nicotine exposure and child behavioural problems. *Eur Child Adolesc Psychiatry* 2014; 23: 913–929
- Clifford A, Lang L, Chen R. Effects of maternal cigarette smoking during pregnancy on cognitive parameters of children and young adults: a literature review. *Neurotoxicol Teratol* 2012; 34: 560–570
- Dörrie N, Föcker M, Freunschütz I et al. Fetal alcohol spectrum disorders. *Eur Child Adolesc Psychiatry* 2014; 23: 863–875
- Patra J, Bakker R, Irving H et al. Dose-response relationship between alcohol consumption before and during pregnancy and the risks of low birthweight, preterm birth and small for gestational age (SGA) – a systematic review and meta-analyses. *BJOG* 2011; 118: 1411–1421
- Flak AL, Su S, Bertrand J et al. The association of mild, moderate and binge prenatal alcohol exposure and child neuropsychological outcomes: a meta-analysis. *Alcohol Clin Exp Res* 2014; 38: 214–226
- Alvik A, Aalen OO, Lindemann R. Early fetal binge alcohol exposure predicts high behavioral symptom scores in 5.5-year-old children. *Alcohol Clin Exp Res* 2013; 37: 1954–1962
- Niclasen J, Andersen AM, Strandberg-Larsen K et al. Is alcohol binge drinking in early and late pregnancy associated with behavioural and emotional development at age 7 years? *Eur Child Adolesc Psychiatry* 2014; 23: 1175–1180
- Schneider S, Maul H, Freerksen N et al. Who smokes during pregnancy? An analysis of the German Perinatal Quality Survey 2005. *Public Health* 2008; 122: 1210–1216
- Scholz R, Voigt M, Schneider K et al. Analysis of the German Perinatal Survey of the years 2007–2011 and comparison with data from 1995–1997: maternal characteristics. *Geburtsh Frauenheilk* 2013; 73: 1247–1251
- Pfinder M, Feldmann R, Liebig S. Alcohol during pregnancy from 1985 to 2005: prevalence and high risk profile. *Sucht* 2013; 59: 165–173
- Schneider S, Huy C, Schütz J et al. Smoking cessation during pregnancy: a systematic literature review. *Drug Alcohol Rev* 2010; 29: 81–90
- Skagerström J, Chang G, Nilsen P. Predictors of drinking during pregnancy: a systematic review. *J Womens Health* 2011; 20: 901–913
- Ulrich F, Petermann F. Zur Bedeutung von sozialer Unterstützung während der Schwangerschaft. *Psychol Rundsch* 2014; 65: 57–74
- Baskin R, Hill B, Jacka FN et al. The association between diet quality and mental health during the perinatal period. A systematic review. *Appetite* 2015; 91: 41–47
- Hartley E, McPhie S, Skouteris H et al. Psychosocial risk factors for excessive gestational weight gain: A systematic review. *Women Birth* 2015; 28: e99–e109
- Kapadia MZ, Gaston A, Van Blyderveen S et al. Psychological antecedents of excess gestational weight gain: a systematic review. *BMC Pregnancy Childbirth* 2015; 15: 107
- Molyneaux E, Poston L, Ashurst-Williams S et al. Obesity and mental disorders during pregnancy and postpartum: a systematic review and meta-analysis. *Obstet Gynecol* 2014; 123: 857–867
- Nagl M, Linde K, Stepan H et al. Obesity and anxiety during pregnancy and postpartum: a systematic review. *J Affect Disord* 2015; 186: 293–305
- Abajobir AA, Maravilla JC, Alati R et al. A systematic review and meta-analysis of the association between unintended pregnancy and perinatal depression. *J Affect Disord* 2016; 192: 56–63
- Alvarez-Segura M, Garcia-Esteve L, Torres A et al. Are women with a history of abuse more vulnerable to perinatal depressive symptoms? A systematic review. *Arch Womens Ment Health* 2014; 17: 343–357
- Biaggi A, Conroy S, Pawlby S et al. Identifying the women at risk of antenatal anxiety and depression: a systematic review. *J Affect Disord* 2016; 191: 62–77

- 46 Fisher J, Cabral de Mello M, Patel V et al. Prevalence and determinants of common perinatal mental disorders in women in low- and lower-middle-income countries: a systematic review. *Bull World Health Organ* 2012; 90: 139–149
- 47 Howard LM, Oram S, Galley H et al. Domestic violence and perinatal mental disorders: a systematic review and meta-analysis. *PLoS Med* 2013; 10: e1001452
- 48 Lancaster CA, Gold KJ, Flynn HA et al. Risk factors for depressive symptoms during pregnancy: a systematic review. *Am J Obstet Gynecol* 2010; 202: 5–14
- 49 Leach LS, Poyser C, Fairweather-Schmidt K. Maternal perinatal anxiety: a review of prevalence and correlates. *Clinical Psychologist* 2015; DOI: 10.1111/cp.12058
- 50 Pilkington PD, Milne LC, Cairns KE et al. Modifiable partner factors associated with perinatal depression and anxiety: a systematic review and meta-analysis. *J Affect Disord* 2015; 178: 165–180
- 51 Baron R, Manniën J, de Jonge A et al. Socio-demographic and lifestyle-related characteristics associated with self-reported any, daily and occasional smoking during pregnancy. *PLoS One* 2013; 8: e74197
- 52 Beijers C, Ormel J, Meijer JL et al. Stressful events and continued smoking and continued alcohol consumption during mid-pregnancy. *PLoS One* 2014; 9: e86359
- 53 De Wilde KS, Trommelmans LC, Laeven HH et al. Smoking patterns, depression, and sociodemographic variables among Flemish women during pregnancy and the postpartum period. *Nurs Res* 2013; 62: 394–404
- 54 Hauge LJ, Torgersen L, Vollrath M. Associations between maternal stress and smoking: findings from a population-based prospective cohort study. *Addiction* 2012; 107: 1168–1173
- 55 Iversen ML, Sorensen NO, Broberg L et al. Alcohol consumption and binge drinking in early pregnancy. A cross-sectional study with data from the Copenhagen Pregnancy Cohort. *BMC Pregnancy Childbirth* 2015; 15: 327
- 56 Kale PL, Fonseca SC, da Silva KS et al. Smoking prevalence, reduction, and cessation during pregnancy and associated factors: a cross-sectional study in public maternities, Rio de Janeiro, Brazil. *BMC Public Health* 2015; 15: 406
- 57 Kharkova OA, Krettek A, Grjibovski AM et al. Prevalence of smoking before and during pregnancy and changes in this habit during pregnancy in Northwest Russia: a Murmansk county birth registry study. *Reprod Health* 2016; 13: 18
- 58 Masho SB, Bishop DL, Keyser-Marcus L et al. Least explored factors associated with prenatal smoking. *Matern Child Health J* 2013; 17: 1167–1174
- 59 Maxson PJ, Edwards SE, Ingram A et al. Psychosocial differences between smokers and non-smokers during pregnancy. *Addict Behav* 2012; 37: 153–159
- 60 McDonald SW, Hicks M, Rasmussen C et al. Characteristics of woman who consume alcohol before and after pregnancy recognition in a Canadian Sample: a prospective cohort study. *Alcohol Clin Exp Res* 2014; 38: 3008–3016
- 61 Melchior M, Chollat A, Glangeaud-Freudenthal N et al. Tobacco and alcohol use in pregnancy in France: the role of migrant status. The nationally representative ELFE study. *Addict Behav* 2015; 51: 65–71
- 62 Murphy DJ, Mullally A, Cleary BJ et al. Behavioural change in relation to alcohol exposure in early pregnancy and impact on perinatal outcomes – a prospective cohort study. *BMC Pregnancy Childbirth* 2013; 13: 8
- 63 Murphy DJ, Dunne C, Mullally A et al. Population-based study of smoking behaviour throughout pregnancy and adverse perinatal outcomes. *Int J Environ Res Public Health* 2013; 10: 3855–3867
- 64 O’Keeffe LM, Kearney PM, McCarthy FP et al. Prevalence and predictors of alcohol use during pregnancy: findings from international multicentre cohort studies. *BMJ* 2015; 5: e006323
- 65 Powers JR, McDermott LJ, Loxton DJ et al. A prospective study of prevalence and predictors of concurrent alcohol and tobacco use during pregnancy. *Matern Child Health J* 2013; 17: 76–84
- 66 Skagerström J, Alehagen S, Häggström-Nordin E et al. Prevalence of alcohol use before and during pregnancy and predictors of drinking during pregnancy: a cross sectional study in Sweden. *BMC Public Health* 2013; 13: 780
- 67 Smedberg J, Lupattelli A, Mårdby AC et al. Characteristics of women who continue smoking during pregnancy: a cross-sectional study of pregnant women and new mothers in 15 European countries. *BMC Pregnancy Childbirth* 2014; 14: 213
- 68 Smedberg J, Lupattelli A, Mårdby AC et al. The relationship between maternal depression and smoking cessation during pregnancy—a cross-sectional study of pregnant women from 15 European countries. *Arch Womens Ment Health* 2015; 18: 73–84
- 69 Althuisen E, van Poppel MN, Seidell JC et al. Correlates of absolute and excessive weight gain during pregnancy. *J Womens Health (Larchmt)* 2009; 18: 1559–1566
- 70 Brawarsky P, Stotland NE, Jackson RA et al. Pre-pregnancy and pregnancy-related factors and the risk of excessive or inadequate gestational weight gain. *Int J Gynaecol Obstet* 2005; 91: 125–131
- 71 Chasan-Taber L, Schmidt MD, Pekow P et al. Predictors of excessive and inadequate gestational weight gain in Hispanic women. *Obesity* 2008; 16: 1657–1666
- 72 Gaillard R, Durmus B, Hofman A et al. Risk factors and outcomes of maternal obesity and excessive weight gain during pregnancy. *Obesity* 2013; 21: 1046–1055
- 73 Herring SJ, Nelson DB, Davey A et al. Determinants of excessive gestational weight gain in urban, low-income women. *Womens Health Issues* 2012; 22: e439–e446
- 74 Kraschewski JL, Chuang CH, Downs DS et al. Association of prenatal physical activity and gestational weight gain: results from the first baby study. *Womens Health Issues* 2013; 23: e233–e238
- 75 Lan-Pidhainy X, Nohr EA, Rasmussen KM. Comparison of gestational weight gain-related pregnancy outcomes in American primiparous and multiparous women. *Am J Clin Nutr* 2013; 97: 1100–1106
- 76 Lobel M, Cannella DL, Graham JE et al. Pregnancy-specific stress, prenatal health behaviors, and birth outcomes. *Health Psychol* 2008; 27: 604–615
- 77 Nash DM, Gilliland JA, Evers SE et al. Determinants of diet quality in pregnancy: sociodemographic, pregnancy-specific, and food environment influences. *J Nutr Educ Behav* 2013; 45: 627–634
- 78 Nilsen RM, Leoncini E, Gastaldi P et al. Prevalence and determinants of preconception folic acid use: an Italian multicenter survey. *J Pediatr* 2016; 42: 65
- 79 Nilsen RM, Vollset SE, Gjessing HK et al. Patterns and predictors of folic acid supplement use among pregnant women: the Norwegian Mother and Child Cohort Study. *Am J Clin Nutr* 2006; 84: 1134–1141
- 80 Nohr EA, Vaeth M, Baker JL et al. Combined associations of prepregnancy body mass index and gestational weight gain with the outcome of pregnancy. *Am J Clin Nutr* 2008; 87: 1750–1759
- 81 Northstone N, Emmett P, Rogers I. Dietary patterns in pregnancy and associations with socio-demographic and lifestyle factors. *Eur J Clin Nutr* 2008; 62: 471–479
- 82 Pouchieu C, Lévy R, Faure C et al. Socioeconomic, lifestyle and dietary factors associated with dietary supplement use during pregnancy. *PLoS One* 2013; 8: e70733
- 83 Restall A, Taylor RS, Thompson JM et al. Risk factors for excessive gestational weight gain in a healthy, nulliparous cohort. *J Obes* 2014; 2014: 148391
- 84 Rifas-Shiman SL, Rich-Edwards JW, Kleinman KP et al. Dietary quality during pregnancy varies by maternal characteristics in project viva: a US cohort. *J Am Diet Assoc* 2009; 109: 1004–1011
- 85 Shin D, Lee KW, Song WO. Pre-pregnancy weight status is associated with diet quality and nutritional biomarkers during pregnancy. *Nutrients* 2016; 8: 162
- 86 Timmermans S, Jaddoe VW, Mackenbach JP et al. Determinants of folic acid use in early pregnancy in a multi-ethnic urban population in The Netherlands: the Generation R Study. *Prev Med* 2008; 47: 427–432
- 87 Wall CR, Gammon CS, Bandara DK et al. Dietary patterns in pregnancy in New Zealand—influence of maternal socio-demographic, health and lifestyle factors. *Nutrients* 2016; 8: 300
- 88 Ditzen B, Heinrichs M. Psychobiology of social support: the social dimension of stress buffering. *Restor Neurol Neurosci* 2014; 32: 149–162
- 89 Boucher J, Konkle AT. Understanding inequalities of maternal smoking—bridging the gap with adapted intervention strategies. *Int J Environ Res Public Health* 2016; 13: E282
- 90 Berti C, Cetin I, Agostoni C et al. Pregnancy and infants’ outcome: nutritional and metabolic implications. *Crit Rev Food Sci* 2016; 56: 82–91
- 91 Koletzko B, Bauer CP, Bung P et al. German National Consensus Recommendations on Nutrition and Lifestyle in Pregnancy by the ‘Healthy Start – Young Family Network’. *Ann Nutr Metab* 2013; 63: 311–322
- 92 Prado EL, Dewey KG. Nutrition and brain development in early life. *Nutr Rev* 2014; 72: 267–284

- 93 Rasmussen KM, Catalano PM, Yaktine AL. New guidelines for weight gain during pregnancy: what obstetrician/gynecologists should know. *Curr Opin Obstet Gynecol* 2009; 21: 521–526
- 94 Chen X, Zhao D, Mao X *et al.* Maternal dietary patterns and pregnancy outcome. *Nutrients* 2016; 8: E351
- 95 Jacka FN, Ystrom E, Brantsaeter AL *et al.* Maternal and early postnatal nutrition and mental health of offspring by age 5 years: a prospective cohort study. *J Am Acad Child Psy* 2013; 52: 1038–1047
- 96 Steenweg-de Graaff J, Tiemeier R, Steegers-Theunissen P *et al.* Maternal dietary patterns during pregnancy and child internalising and externalising problems: the Generation R Study. *Clin Nutr* 2014; 33: 115–121
- 97 Black RE, Victora CG, Walker SP *et al.* Maternal and child undernutrition and overweight in low-income and middle-income countries. *Lancet* 2013; 382: 427–451
- 98 Ramakrishnan U, Grant F, Goldenberg T *et al.* Effect of women's nutrition before and during pregnancy on maternal and infant outcomes: a systematic review. *Paediatr Perinat Ep* 2012; 26 (Suppl. 1): 285–301
- 99 Haider BA, Bhutta ZA. Multiple-micronutrient supplementation for women during pregnancy. *Cochrane Database Syst Rev* 2012; (11): CD004905
- 100 Nyaradi A, Li JH, Hickling S *et al.* The role of nutrition in children's neurocognitive development, from pregnancy through childhood. *Front Hum Neurosci* 2013; 7: 97
- 101 Siega-Riz AM, Viswanathan M, Moos MK *et al.* A systematic review of outcomes of maternal weight gain according to the Institute of Medicine recommendations: birthweight, fetal growth, and postpartum weight retention. *Am J Obstet Gynecol* 2009; 339: e1–e14
- 102 Nehring I, Lehmann S, Kries R. Gestational weight gain in accordance to the IOM/NRC criteria and the risk for childhood overweight: a meta-analysis. *Pediatr Obes* 2013; 8: 218–224
- 103 Yu Z, Han S, Zhu J *et al.* Pre-pregnancy body mass index in relation to infant birth weight and offspring overweight/obesity: a systematic review and meta-analysis. *PLoS One* 2013; 8: e61627
- 104 Han Z, Lutsi O, Mulla S *et al.* Low gestational weight gain and the risk of preterm birth and low birthweight: a systematic review and meta-analyses. *Acta Obstet Gyn Scan* 2011; 90: 935–954
- 105 Rahman MM, Abe SK, Kanda M *et al.* Maternal body mass index and risk of birth and maternal health outcome in low- and middle-income countries: a systematic review and meta-analysis. *Obes Rev* 2015; 16: 758–770
- 106 Alcazar MAA, Nüsken E, Nüsken KD. Programmierung durch intrauterine Mangelversorgung. *Monatsschr Kinderheilkd* 2016; 164: 106–113
- 107 Gaillard R. Maternal obesity during pregnancy and cardiovascular development and disease in the offspring. *Eur J Epidemiol* 2015; 30: 1141–1152
- 108 van Lieshout RJ. Role of maternal adiposity prior to and during pregnancy in cognitive and psychiatric problems in offspring. *Nutr Rev* 2013; 71: S95–S101
- 109 van Lieshout RJ, Taylor VH, Boyle MH. Pre-pregnancy and pregnancy obesity and neurodevelopmental outcomes in offspring: a systematic review. *Obes Rev* 2011; 12: e548–e559
- 110 Blumfield ML, Hure AJ, Macdonald-Wicks L *et al.* Systematic review and meta-analysis of energy and macronutrient intakes during pregnancy in developed countries. *Nutr Rev* 2012; 70: 322–336
- 111 Blumfield ML, Hure AJ, Macdonald-Wicks L *et al.* Micronutrient intakes during pregnancy in developed countries: systematic review and meta-analysis. *Nutr Rev* 2013; 71: 118–132
- 112 Muff C, Weyers S. Sozialer Status und Ernährungsqualität. Evidenz, Ursachen und Interventionen. *Ernährungsumschau* 2010; 10: 84–89
- 113 Beijers R, Buitelaar JK, de Weerth C. Mechanisms underlying the effects of prenatal psychosocial stress on child outcomes: beyond the HPA axis. *Eur Child Adolesc Psychiatry* 2014; 23: 943–956
- 114 Entringer S, Buss C, Wadhwa PD. Prenatal stress, development, health and disease risk: A psychological perspective-2015 Curt Richter Award Paper. *Psychoneuroendocrinology* 2015; 62: 366–375
- 115 Alder J, Fink N, Bitzer J. Depression and anxiety during pregnancy: a risk factor for obstetric, fetal and neonatal outcome? A critical review of the literature. *J Matern Fetal Neonatal Med* 2007; 20: 189–209
- 116 Grigoriadis S, VonderPorten EH, Mamisashvili L *et al.* The impact of maternal depression during pregnancy on perinatal outcomes: a systematic review and meta-analysis. *J Clin Psychiatry* 2013; 74: e321–e341
- 117 Hu R, Li Y, Zhang Z *et al.* Antenatal depressive symptoms and the risk of preeclampsia or operative deliveries: a meta-analysis. *PLoS One* 2015; 10: e0119018
- 118 Bussi eres EL, Tarabulsy GM, Pearson J *et al.* Maternal prenatal stress and infant birth weight and gestational age: a meta-analysis of prospective studies. *Dev Rev* 2015; 36: 179–199
- 119 Ding XX, Wu YL, Xu SJ *et al.* Maternal anxiety during pregnancy and adverse birth outcomes: a systematic review and meta-analysis of prospective cohort studies. *J Affect Disord* 2014; 159: 103–110
- 120 Staneva A, Bogossian F, Pritchard M *et al.* The effects of maternal depression, anxiety, and perceived stress during pregnancy on preterm birth: a systematic review. *Women Birth* 2015; 28: 179–193
- 121 Grote NK, Bridge JA, Gavin AR *et al.* A meta-analysis of depression during pregnancy and the risk of preterm birth, low birth weight, and intrauterine growth restriction. *Arch Gen Psychiatry* 2010; 67: 1012–1024
- 122 Szegda K, Markenson G, Bertone-Johnson ER *et al.* Depression during pregnancy: a risk factor for adverse neonatal outcomes? A critical review of the literature. *J Matern Fetal Neonatal Med* 2014; 27: 960–967
- 123 Martini J, Knappe S, Garthus-Niegel S *et al.* Psychische St rungen in den reproduktiven Phasen der Frau: H ufigkeiten, Verlauf und Besonderheiten. *Fortschr Neurol Psychiatr* 2016; 84: 432–449
- 124 Paschetta E, Berrisford G, Coccia F *et al.* Perinatal psychiatric disorder: an overview. *Am J Obstet Gynecol* 2014; 210: 501–509
- 125 Goodman SH. Depression in mothers. *Annu Rev Clin Psychol* 2007; 3: 107–135
- 126 Kaitz M, Maytal H. Interactions between anxious mothers and their infants: an integration of theory and research findings. *Infant Ment Health* 2005; 26: 570–597
- 127 Stewart RC. Maternal depression and infant growth: a review of recent evidence. *Matern Child Nutr* 2007; 3: 94–107
- 128 Graignic-Philippe R, Dayan J, Chokron S *et al.* Effects on prenatal stress on fetal and child development: a critical review. *Neurosci Biobehav R* 2014; 43: 137–162
- 129 Stein A, Pearson RM, Goodman SH *et al.* Effects of perinatal mental disorders on the fetus and child. *Lancet* 2014; 384: 1800–1819
- 130 Kingston D, McDonald S, Austin MP *et al.* Association between prenatal and postnatal psychological distress and toddler cognitive development: a systematic review. *PLoS One* 2015; 10: e0126929
- 131 Kingston D, Tough S, Whitfield H. Prenatal and postpartum maternal psychological distress and infant development: a systematic review. *Child Psychiatr Hum D* 2012; 43: 683–714
- 132 Tarabulsy GM, Pearson J, Vaillancourt-Morel MP *et al.* Meta-analytic findings of the relation between maternal prenatal stress and anxiety and child cognitive outcome. *J Dev Behav Pediatr* 2014; 35: 38–43
- 133 Waters CS, Hay DF, Simmonds JR *et al.* Antenatal depression and children's developmental outcomes: potential mechanisms and treatment options. *Eur Child Adolesc Psychiatry* 2014; 23: 957–971
- 134 Woods SM, Melville JL, Guo YQ *et al.* Psychosocial stress during pregnancy. *Am J Obstet Gynecol* 2010; 202: 61.e1–61.e7
- 135 Gavin NI, Gaynes BN, Lohr KN *et al.* Perinatal depression: a systematic review of prevalence and incidence. *Obstet Gynecol* 2005; 106: 1071–1083
- 136 Goodman JH, Chenausky KL, Freeman MP. Anxiety disorder during pregnancy: a systematic review. *J Clin Psychiatry* 2014; 75: e1153–e1184
- 137 Martini J, Asselmann E, Einsle F *et al.* A prospective-longitudinal study on the association of anxiety disorders prior to pregnancy and pregnancy- and child-related fears. *J Anxiety Disord* 2016; 40: 58–66
- 138 Liepe K, Bl ttner B. Gewalterfahrungen in der Schwangerschaft: Pr valenzstudien in den OECD-L ndern. *Gesundheitswesen* 2013; 75: 473–480
- 139 Chambliss LR. Intimate partner violence and its implication for pregnancy. *Clin Obstet Gynecol* 2008; 51: 385–397
- 140 De Almeida CP, S  E, Cunha F. Violence during pregnancy and its effects on mother-baby relationship during pregnancy. *J Reprod Infant Psych* 2013; 31: 370–380
- 141 Chan KL, Brownridge DA, Fong DYT *et al.* Violence against pregnant women can increase the risk of child abuse: a longitudinal study. *Child Abuse Negl* 2012; 36: 275–284
- 142 Dixon L, Browne K, Hamilton-Giachritsis C. Risk factors of parents abused as children: a mediational analysis of the intergenerational continuity of child maltreatment (part I). *J Child Psychol Psychiatry* 2005; 46: 47–57

- 143 Kersting A. Peripartale Depressionen und Trauer nach Schwangerschaftsverlusten. Besondere Problemfelder in der Geburtshilfe. *Nervenarzt* 2012; 83: 1434–1441
- 144 McDonald K, Amir LH, Davey MA. Maternal bodies and medicines: a commentary on risk and decision-making of pregnant and breast-feeding women and health professionals. *BMC Public Health* 2011; 11: S5
- 145 Crozier SR, Robinson SM, Borland SE et al. Do women change their health behaviours in pregnancy? Findings from the Southampton Women's Survey. *Paediatr Perinat Epidemiol* 2009; 23: 446–453
- 146 Deutsche Hauptstelle für Suchtfragen (DHS), Hrsg. Factsheet: Alkohol in der Schwangerschaft. März 2010. Online: [http://www.dhs.de/fileadmin/user\\_upload/pdf/Factsheets/100319\\_Factsheet\\_FASD\\_-\\_DIN.pdf](http://www.dhs.de/fileadmin/user_upload/pdf/Factsheets/100319_Factsheet_FASD_-_DIN.pdf); Stand: 15.08.2016
- 147 Stiegler A, Bieber L, Karacay K et al. Barrieren in der Thematisierung des Tabak- und Alkoholkonsums Schwangerer in der gynäkologischen Praxis. Eine Fokusgruppenstudie mit Frauenärzten. *Gesundheitswesen* 2015; DOI: 10.1055/s-0035-1548935
- 148 Schild RL. Soziale Vorsorge und allgemeine Beratung in der Schwangerschaft. *Gynäkologe* 2015; 48: 736–740
